# Supplementary material for: Transcriptomic Analysis Reveals Candidate Genes Responding Maize Gray Leaf Spot Caused by Cercospora zeina
Source: MDPI journal article supplement (doi:10.3390/plants10112257), 2021-10-22
Supplement: s1 [file s1]

| Inbred lines | Time points | Replications | Total Reads | Mapped Reads | Unique Mapped Reads | Mapping Rates (%) | Unique Mapping Rates (%) | Number of expression genes |
|--------------|-------------|--------------|-------------|--------------|---------------------|-------------------|--------------------------|----------------------------|
| R6           | 0 hpi       | repl_1       | 16147756    | 11160006     | 10808262            | 69                | 67                       | 25264                      |
|              |             | repl_2       | 31961426    | 22677066     | 22067928            | 71                | 69                       | 26435                      |
|              | 6 hpi       | repl_1       | 25996212    | 18787010     | 18426252            | 72                | 71                       | 26670                      |
|              |             | repl_2       | 19875490    | 13819887     | 13572709            | 70                | 68                       | 25778                      |
|              | 24 hpi      | repl_1       | 27744036    | 18450741     | 17955011            | 67                | 65                       | 25864                      |
|              |             | repl_2       | 28210470    | 20063678     | 19594558            | 71                | 69                       | 25754                      |
|              | 144 hpi     | repl_1       | 21671620    | 15103986     | 14748580            | 70                | 68                       | 26105                      |
|              |             | repl_2       | 19969828    | 14039598     | 13647962            | 70                | 68                       | 25595                      |
|              | 240 hpi     | repl_1       | 23097500    | 15812601     | 15458365            | 68                | 67                       | 25724                      |
|              |             | repl_2       | 22919920    | 14968590     | 14662914            | 65                | 64                       | 26016                      |
| S8           | 0 hpi       | repl_1       | 32098076    | 22735773     | 21990399            | 71                | 69                       | 26822                      |
|              |             | repl_2       | 32233060    | 22810764     | 22060430            | 71                | 68                       | 26668                      |
|              | 6 hpi       | repl_1       | 28409020    | 19960031     | 19417027            | 70                | 68                       | 27065                      |
|              |             | repl_2       | 20590866    | 14681383     | 14313683            | 71                | 70                       | 26633                      |
|              | 24 hpi      | repl_1       | 33311232    | 23179468     | 22446594            | 70                | 67                       | 26581                      |
|              |             | repl_2       | 33042598    | 22875556     | 22211380            | 69                | 67                       | 26782                      |
|              | 144 hpi     | repl_1       | 38186826    | 25908587     | 25317497            | 68                | 66                       | 27529                      |
|              |             | repl_2       | 28872340    | 20397267     | 19864117            | 71                | 69                       | 27124                      |
|              | 240 hpi     | repl_1       | 31198486    | 20602020     | 20158080            | 66                | 65                       | 27130                      |
|              |             | repl_2       | 34753676    | 23383228     | 22796674            | 67                | 66                       | 27187                      |
