# Supplementary material for: Transcriptomic Analysis Reveals Candidate Genes Responding Maize Gray Leaf Spot Caused by Cercospora zeina
Source: MDPI journal article supplement (doi:10.3390/plants10112257), 2021-10-22
Supplement: s1 [file s1]

| Gene ID           | 5'-3' primer sequences |
|-------------------|------------------------|
| GRMZM2G151567-fw  | GTTGTCGGCCAGATACCAGC   |
| GRMZM2G151567-rev | TTCCCGATGAATGAAGGCAC   |
| GRMZM2G465226-fw  | ACTGCCAGCTGATCCACTCC   |
| GRMZM2G465226-rev | ACTGCTTCTCGGACACCCAG   |
| GRMZM2G145461-fw  | GAAGAAGTACTACGGCCGCG   |
| GRMZM2G145461-rev | GGCGTCATCCAGAACCAGAC   |
| GRMZM2G007928-fw  | GACCAGTGCGGCATTTGCAC   |
| GRMZM2G007928-rev | AAGAGGCCGTCGGAGATGGA   |
| GRMZM2G075283-fw  | GCATGTGGAAGGTGGCCTTC   |
| GRMZM2G075283-rev | CTTCATGGTGGTGACGCTGC   |
| GRMZM2G148561-fw  | TGCTGGCTTCCTCGCTCTCC   |
| GRMZM2G148561-rev | TGCGGTCCAGCAGGTTGATG   |
| GRMZM2G361611-fw  | GACATCCTCGCCTGCATGAA   |
| GRMZM2G361611-rev | GGCAGGATCTGAGGAGGTCTG  |
