# Supplementary material for: Transcriptomic Analysis Reveals Candidate Genes Responding Maize Gray Leaf Spot Caused by Cercospora zeina
Source: MDPI journal article supplement (doi:10.3390/plants10112257), 2021-10-22
Supplement: s1 [file s1]

| QTLs               | Chromosomes | Bin       | SSR markers      | Physical interval       |
|--------------------|-------------|-----------|------------------|-------------------------|
| <i>qRgls. CH-1</i> | 1           | 1.05-1.07 | Umc2232-umc2237  | 164,508,927-224,970,667 |
| <i>qRgls. CH-2</i> | 2           | 2.00-2.02 | Umc1419-umc1265  | 945,637-8,019,086       |
| <i>qRgls. CH-3</i> | 3           | 3.04-3.05 | Umc1539-umc2266  | 168,492,776-178,184,934 |
| <i>qRgls. CH-4</i> | 4           | 4.05-4.06 | Umc1329-umc1346  | 135,229,161-166,915,798 |
| <i>qRgls. CH-6</i> | 6           | 6.02-6.05 | Bnlg2191-umc2055 | 91,124,061-132,980,851  |
