# Supplementary material for: Transcriptomic Analysis Reveals Candidate Genes Responding Maize Gray Leaf Spot Caused by Cercospora zeina
Source: MDPI journal article supplement (doi:10.3390/plants10112257), 2021-10-22
Supplement: s1 [file s1]

| <b>Genes</b>  | <b>Chromosome</b> | <b>Putative protein</b>                                               | <b>position</b>         |
|---------------|-------------------|-----------------------------------------------------------------------|-------------------------|
| GRMZM2G702599 | 4                 | leucine-rich repeat<br>receptor-like protein kinase<br>family protein | 139,022,453:139,023,167 |
| GRMZM2G044537 | 4                 | RING zinc finger protein-<br>like                                     | 155,937,505:155,938,986 |
| GRMZM2G447795 | 6                 | Xylanase inhibitor protein<br>1                                       | 129,268,963:129,270,180 |
| GRMZM2G171114 | 6                 | Leucine-rich repeat protein<br>kinase family protein                  | 103,870,389:103,873,917 |
| GRMZM2G135108 | 6                 | Peroxidase                                                            | 125,194,486:125,196,087 |
