# Supplementary material for: Transcriptomic Analysis Reveals Candidate Genes Responding Maize Gray Leaf Spot Caused by Cercospora zeina
Source: Plants (Basel). 2021 Oct 22;10(11):2257. doi: 10.3390/plants10112257 (PMC8625984; doi:10.3390/plants10112257)
Supplement: Supplementary file 1 [file plants-10-02257-s001.zip › Table S2.xlsx]

## Sheet: Sheet1
Stable common DEGs in S8 among all time points	Stable common DEGs in R6 among all time points	Overlapped common DEGs among all time points between R6 and S8
GRMZM2G332423	GRMZM2G092363	GRMZM2G092363
GRMZM2G092363	GRMZM2G111987	GRMZM2G304474
GRMZM2G304474	GRMZM2G304474	GRMZM2G075262
GRMZM2G075262	GRMZM2G075262	GRMZM2G097116
GRMZM2G034404	GRMZM2G097116	GRMZM2G153523
GRMZM2G097116	GRMZM2G448185	GRMZM2G168115
GRMZM2G044902	GRMZM2G153523	GRMZM5G878379
GRMZM2G153523	GRMZM2G168115	GRMZM2G357631
GRMZM2G168115	GRMZM5G878379	GRMZM2G402977
GRMZM5G878379	GRMZM2G138770	GRMZM2G158700
GRMZM2G357631	GRMZM2G123394	GRMZM5G869403
GRMZM2G402977	GRMZM2G026889	GRMZM2G364612
GRMZM2G158700	GRMZM2G357631	GRMZM2G006676
GRMZM5G869403	GRMZM2G402977	GRMZM2G006977
GRMZM2G364612	GRMZM2G401026	GRMZM5G843446
GRMZM2G132958	GRMZM2G138396	AC225718.2_FG006
GRMZM2G006676	GRMZM2G163843	GRMZM2G104118
GRMZM2G047479	GRMZM2G137864	GRMZM2G070312
GRMZM2G006977	GRMZM2G158700	GRMZM2G368047
GRMZM5G803404	GRMZM2G127050	GRMZM2G057779
GRMZM5G843446	GRMZM5G869403	GRMZM2G055052
AC225718.2_FG006	GRMZM2G364612	GRMZM2G145458
GRMZM2G104118	GRMZM2G006676	GRMZM2G119823
GRMZM2G076593	GRMZM2G006977	GRMZM2G012453
GRMZM2G070312	GRMZM2G351937	GRMZM2G027825
GRMZM2G368047	GRMZM5G843446	GRMZM2G057509
GRMZM2G094017	GRMZM2G449681	GRMZM5G879872
GRMZM2G177050	GRMZM2G137802	GRMZM2G096904
GRMZM2G171187	AC225718.2_FG006	GRMZM2G438202
GRMZM5G832473	GRMZM2G008839	GRMZM2G131055
GRMZM2G057779	GRMZM2G022934	GRMZM2G134878
GRMZM2G055052	GRMZM2G104118	GRMZM2G342197
GRMZM2G145458	GRMZM2G375504	GRMZM2G451769
GRMZM2G119823	GRMZM2G064541	GRMZM2G153683
GRMZM2G012453	GRMZM2G070312	GRMZM2G177510
GRMZM2G027825	GRMZM2G339540	GRMZM2G149636
GRMZM2G167492	GRMZM2G368047	AC209257.4_FG008
GRMZM2G176394	GRMZM2G165944	GRMZM2G037422
GRMZM2G057509	GRMZM2G340807	GRMZM2G069335
GRMZM5G879872	GRMZM2G090328	GRMZM2G374074
GRMZM2G438652	GRMZM2G020016	GRMZM2G119766
GRMZM2G096904	GRMZM2G466044	GRMZM2G405017
GRMZM2G438202	GRMZM2G057779	GRMZM2G474755
GRMZM2G039586	GRMZM2G046163	GRMZM2G160710
GRMZM2G131055	AC220927.3_FG007	GRMZM2G434203
GRMZM2G134878	GRMZM2G039841	GRMZM2G335685
GRMZM2G116685	GRMZM2G320506	GRMZM2G116238
GRMZM2G342197	GRMZM2G105604	GRMZM2G414540
GRMZM2G125991	GRMZM2G055052	GRMZM2G012724
GRMZM2G451769	GRMZM2G145458	GRMZM2G703858
GRMZM2G153683	GRMZM2G421240	GRMZM2G041809
GRMZM2G177510	GRMZM2G119823	GRMZM2G477139
GRMZM2G149636	GRMZM2G012453	GRMZM2G081949
GRMZM2G466298	GRMZM2G027825	GRMZM2G475185
GRMZM2G179024	GRMZM2G057509	GRMZM2G107521
AC209257.4_FG008	GRMZM5G879872	GRMZM2G465835
GRMZM2G037422	GRMZM2G080191	GRMZM2G109056
GRMZM2G069335	GRMZM2G329181	GRMZM5G870176
GRMZM2G134545	GRMZM2G173596	GRMZM2G059392
GRMZM2G374074	GRMZM2G145460	GRMZM2G439350
GRMZM2G119766	GRMZM2G165301	GRMZM2G000587
GRMZM2G399136	GRMZM2G096904	GRMZM2G069126
GRMZM2G300135	GRMZM2G022514	GRMZM2G101769
GRMZM2G440972	GRMZM2G438202	GRMZM2G043396
GRMZM2G405017	GRMZM2G310368	GRMZM2G380377
GRMZM2G474755	GRMZM2G131055	GRMZM2G020054
GRMZM2G160710	GRMZM2G134878	AC210669.3_FG001
GRMZM2G099049	GRMZM2G110220	GRMZM2G160906
GRMZM2G434203	GRMZM2G324248	GRMZM2G029087
GRMZM2G335685	GRMZM2G342197	GRMZM2G175425
GRMZM2G429533	GRMZM2G049229	GRMZM2G401436
GRMZM2G116238	GRMZM2G405090	GRMZM2G382035
GRMZM2G414540	GRMZM2G005849	GRMZM2G073272
GRMZM2G012724	GRMZM2G451769	GRMZM2G042179
GRMZM2G703858	GRMZM2G133430	GRMZM2G149422
GRMZM2G041809	GRMZM5G866099	GRMZM5G808787
GRMZM2G102923	GRMZM2G153683	GRMZM2G135027
GRMZM2G477139	GRMZM2G177510	GRMZM2G121565
GRMZM2G081949	GRMZM2G149636	GRMZM2G089720
GRMZM2G475185	GRMZM2G044498	GRMZM2G047600
GRMZM2G107521	GRMZM2G026406	GRMZM2G061408
GRMZM2G465835	GRMZM2G025182	GRMZM2G080567
GRMZM2G109056	GRMZM2G145972	GRMZM2G126413
GRMZM2G138248	GRMZM2G147221	GRMZM2G037015
GRMZM2G318652	GRMZM2G165679	GRMZM2G465287
GRMZM5G870176	AC209257.4_FG008	GRMZM2G059397
GRMZM2G059392	GRMZM2G037422	GRMZM2G157068
GRMZM2G439350	GRMZM2G129815	GRMZM2G074987
GRMZM2G000587	GRMZM2G069335	GRMZM2G127690
GRMZM2G069126	GRMZM2G095873	GRMZM6G880411
AC206901.3_FG005	GRMZM5G819965	GRMZM2G114772
GRMZM2G101769	GRMZM5G858165	GRMZM2G042895
GRMZM2G043396	GRMZM2G374074	GRMZM2G322672
GRMZM2G380377	GRMZM2G013324	GRMZM2G159179
GRMZM2G020054	GRMZM2G119766	GRMZM2G118172
AC210669.3_FG001	GRMZM2G104538	GRMZM2G053987
GRMZM2G160906	GRMZM2G318180	GRMZM2G095588
GRMZM2G029087	GRMZM2G075974	GRMZM2G070943
GRMZM2G175425	GRMZM2G467007	GRMZM2G303964
GRMZM2G401436	GRMZM2G405017	GRMZM2G038183
GRMZM2G382035	GRMZM2G474755	GRMZM2G153206
GRMZM2G073272	GRMZM2G160710	GRMZM2G002465
GRMZM2G082484	GRMZM2G434203	GRMZM2G355572
GRMZM2G420715	GRMZM2G144024	GRMZM2G063533
GRMZM2G066820	GRMZM2G335685	GRMZM2G443548
GRMZM2G042179	GRMZM2G123143	GRMZM2G468657
GRMZM2G149422	GRMZM2G116238	GRMZM2G097900
GRMZM5G808787	GRMZM2G462625	GRMZM2G080887
GRMZM2G135027	GRMZM2G414540	GRMZM2G369742
GRMZM2G400156	GRMZM2G012724	GRMZM2G436020
GRMZM2G121565	GRMZM2G703858	GRMZM2G425004
GRMZM2G089720	GRMZM2G041809	GRMZM2G038073
GRMZM2G018666	GRMZM2G110286	GRMZM2G153597
GRMZM2G046615	GRMZM2G020196	GRMZM2G181551
GRMZM2G047600	GRMZM2G477139	GRMZM2G144648
GRMZM2G061408	GRMZM2G079417	GRMZM2G058149
GRMZM2G080567	GRMZM2G081949	GRMZM2G003682
GRMZM2G126413	GRMZM2G314396	GRMZM2G423917
GRMZM2G037015	GRMZM2G461791	GRMZM2G132531
GRMZM2G026147	GRMZM2G468056	GRMZM2G074735
GRMZM2G465287	GRMZM2G330475	GRMZM2G025783
GRMZM2G059397	GRMZM2G164074	GRMZM2G085941
GRMZM2G157068	GRMZM2G475185	GRMZM2G148561
GRMZM5G803308	GRMZM2G107521	GRMZM2G399383
GRMZM2G166616	GRMZM2G050159	GRMZM2G028086
GRMZM2G013002	GRMZM2G465835	GRMZM2G405662
GRMZM2G074987	GRMZM2G109056	GRMZM2G053507
GRMZM2G127690	GRMZM2G022368	GRMZM2G496991
GRMZM6G880411	GRMZM2G094304	GRMZM2G131315
GRMZM2G114772	GRMZM2G036351	GRMZM2G022931
GRMZM2G115762	GRMZM5G870176	GRMZM5G845782
GRMZM2G042895	GRMZM2G059392	XLOC_021436
GRMZM2G322672	GRMZM2G052175	GRMZM2G057113
GRMZM2G159179	GRMZM2G439350	GRMZM2G120001
GRMZM2G118172	GRMZM2G000587	GRMZM2G057672
GRMZM2G053987	GRMZM2G069126	GRMZM2G427697
GRMZM2G095588	GRMZM2G101769	GRMZM2G116614
GRMZM2G070943	GRMZM5G821439	GRMZM2G386674
GRMZM2G303964	GRMZM2G043396	GRMZM2G151257
GRMZM2G038183	XLOC_041747	GRMZM2G413337
GRMZM2G153206	GRMZM2G380377	GRMZM2G023436
GRMZM6G738249	GRMZM2G020054	GRMZM2G068239
GRMZM2G002465	AC210669.3_FG001	GRMZM2G061723
GRMZM2G409128	GRMZM2G160906	GRMZM2G323387
GRMZM2G355572	GRMZM2G029087	GRMZM2G172485
GRMZM2G063533	GRMZM2G175425	GRMZM2G177227
GRMZM2G443548	GRMZM2G401436	AC209050.3_FG003
GRMZM2G468657	GRMZM2G382035	GRMZM2G036703
GRMZM2G097900	GRMZM2G051683	GRMZM2G469828
GRMZM5G847505	GRMZM2G073272	GRMZM2G569948
GRMZM2G357112	GRMZM2G172900	GRMZM2G120320
GRMZM2G080887	GRMZM2G361120	GRMZM2G366910
GRMZM2G163418	GRMZM2G146644	GRMZM2G081957
GRMZM2G369742	GRMZM2G163998	AC205471.4_FG003
GRMZM2G436020	GRMZM2G125034	GRMZM2G145412
GRMZM2G425004	GRMZM2G397402	GRMZM2G066197
GRMZM2G038073	AC196726.2_FG001	GRMZM2G444621
GRMZM2G153597	GRMZM2G027385	GRMZM2G035103
GRMZM2G181551	AC234520.1_FG003	GRMZM2G177340
GRMZM2G144648	GRMZM2G029270	GRMZM2G153527
GRMZM2G058149	GRMZM2G042179	GRMZM2G016521
GRMZM2G003682	GRMZM2G373554	GRMZM2G180086
GRMZM2G423917	GRMZM2G149422	GRMZM2G110145
GRMZM2G132531	GRMZM2G082653	GRMZM2G435592
GRMZM2G074735	GRMZM5G808787	GRMZM2G032160
GRMZM2G026151	GRMZM2G135027	GRMZM2G163054
GRMZM2G025783	GRMZM2G325683	GRMZM2G377215
GRMZM2G085941	GRMZM2G059637	GRMZM2G106792
GRMZM2G305280	GRMZM2G121565	GRMZM2G423669
GRMZM2G148561	GRMZM2G089720	GRMZM2G141133
GRMZM2G399383	GRMZM2G059590	GRMZM2G020150
GRMZM2G028086	GRMZM2G150172	GRMZM2G069082
GRMZM2G405662	GRMZM2G393897	GRMZM2G075712
GRMZM2G362857	GRMZM2G047600	GRMZM2G392125
GRMZM2G095904	GRMZM2G112072	GRMZM2G317426
GRMZM2G053507	GRMZM2G345330	GRMZM2G016264
GRMZM2G496991	GRMZM5G800586	GRMZM2G127537
GRMZM2G022931	GRMZM2G061408	GRMZM2G149024
GRMZM2G131315	XLOC_021774	GRMZM2G028266
GRMZM5G845782	GRMZM2G080567	GRMZM2G470422
XLOC_021436	GRMZM5G889372	GRMZM2G167613
GRMZM2G057113	GRMZM2G132898	GRMZM2G471367
GRMZM2G120001	GRMZM2G126413	GRMZM2G027499
GRMZM2G057672	GRMZM2G037015	GRMZM2G146616
GRMZM2G427697	GRMZM2G457411	GRMZM5G847466
GRMZM2G116614	GRMZM2G140078	GRMZM2G044537
GRMZM2G386674	GRMZM2G465287	GRMZM2G079632
GRMZM2G151257	GRMZM2G059397	GRMZM2G046297
GRMZM2G075315	GRMZM5G882427	GRMZM2G381404
GRMZM2G413337	GRMZM2G138589	GRMZM2G079323
GRMZM2G023436	GRMZM2G159200	GRMZM2G045178
GRMZM2G068239	GRMZM2G157068	GRMZM2G176630
GRMZM2G061723	GRMZM2G029242	GRMZM2G136344
GRMZM2G323387	GRMZM2G115070	GRMZM2G478553
AC195347.4_FG004	AC213521.3_FG005	GRMZM2G467184
GRMZM2G172485	GRMZM2G161245	GRMZM2G069146
GRMZM2G177227	GRMZM2G323828	GRMZM2G128560
AC209050.3_FG003	GRMZM2G394528	GRMZM2G053868
GRMZM2G018212	AC214635.3_FG006	GRMZM2G032602
GRMZM2G036703	GRMZM2G074987	GRMZM2G174396
GRMZM2G469828	GRMZM2G166767	GRMZM2G097704
GRMZM2G569948	GRMZM2G043182	GRMZM2G104655
GRMZM2G120320	GRMZM2G374629	GRMZM2G079682
GRMZM2G366910	GRMZM2G127690	GRMZM2G107031
GRMZM2G081957	GRMZM2G367941	GRMZM2G001930
AC205471.4_FG003	GRMZM6G880411	GRMZM2G057506
GRMZM2G145412	GRMZM2G114772	GRMZM2G054361
GRMZM2G066197	GRMZM2G042895	GRMZM2G069511
GRMZM2G006212	GRMZM2G322672	GRMZM2G071277
GRMZM2G062283	GRMZM2G050427	GRMZM2G028286
GRMZM2G444621	GRMZM2G159179	GRMZM2G146108
GRMZM2G035103	GRMZM2G406758	GRMZM2G057116
GRMZM2G114681	GRMZM2G118172	GRMZM2G072529
GRMZM2G177340	GRMZM5G863344	GRMZM2G066158
GRMZM2G018336	GRMZM2G053987	GRMZM2G163200
GRMZM2G153527	GRMZM2G404973	GRMZM2G013776
GRMZM2G016521	GRMZM2G090584	GRMZM2G088819
GRMZM2G170208	GRMZM2G095588	XLOC_009308
GRMZM2G445616	GRMZM2G075988	GRMZM2G379540
GRMZM2G180086	GRMZM2G070943	GRMZM2G000520
GRMZM2G447480	GRMZM2G303964	GRMZM2G123104
GRMZM2G110145	GRMZM2G038183	GRMZM5G882986
GRMZM2G435592	GRMZM2G153206	GRMZM2G148074
GRMZM2G032160	XLOC_022977	GRMZM2G479529
GRMZM2G323422	GRMZM2G002465	GRMZM2G098517
GRMZM2G163054	GRMZM2G355572	AC208201.3_FG002
GRMZM2G377215	GRMZM2G084486	GRMZM2G054912
GRMZM2G106792	GRMZM2G389557	GRMZM5G860176
GRMZM2G099944	GRMZM2G309950	GRMZM2G024530
GRMZM2G159756	GRMZM2G063533	GRMZM2G073250
GRMZM2G423669	GRMZM2G443548	GRMZM2G076868
GRMZM2G141133	GRMZM2G359521	GRMZM2G042838
GRMZM2G020150	GRMZM2G143139	GRMZM2G104843
GRMZM2G069082	GRMZM2G468657	GRMZM2G060837
GRMZM2G075712	GRMZM2G097900	GRMZM2G026171
GRMZM2G392125	GRMZM2G421791	GRMZM2G093962
GRMZM2G317426	GRMZM2G139765	GRMZM2G041175
GRMZM2G016264	GRMZM2G080887	GRMZM2G158328
GRMZM2G092169	GRMZM5G844173	GRMZM2G137341
GRMZM2G127537	GRMZM2G567897	GRMZM2G177356
GRMZM2G149024	GRMZM2G007256	GRMZM2G149935
GRMZM2G028266	GRMZM2G062197	GRMZM2G142779
GRMZM2G135332	GRMZM2G369742	GRMZM2G462118
GRMZM2G031329	GRMZM2G143204	GRMZM2G099067
GRMZM2G470422	GRMZM2G436020	GRMZM2G037189
GRMZM2G167613	GRMZM2G425004	GRMZM2G079616
GRMZM2G471367	GRMZM2G038073	GRMZM2G130943
GRMZM2G027499	GRMZM2G157675	GRMZM2G089995
GRMZM2G146616	GRMZM2G153597	GRMZM6G287292
GRMZM5G847466	GRMZM2G181551	GRMZM2G139512
GRMZM2G044537	GRMZM2G080583	GRMZM2G380432
GRMZM2G079632	GRMZM2G144648	GRMZM2G447347
GRMZM2G059562	GRMZM2G414252	GRMZM2G104836
GRMZM2G046297	GRMZM2G058149	GRMZM2G437912
GRMZM2G073725	GRMZM2G003682	GRMZM2G027958
GRMZM2G381404	GRMZM2G423917	GRMZM2G080992
GRMZM2G079323	GRMZM2G132531	GRMZM2G317614
GRMZM2G045178	GRMZM2G074735	GRMZM2G162739
GRMZM2G176630	GRMZM2G025783	GRMZM2G127857
GRMZM2G136344	GRMZM2G085941	GRMZM2G100288
GRMZM2G478553	GRMZM2G148561	GRMZM2G157115
GRMZM2G467184	GRMZM2G132185	GRMZM2G090594
GRMZM2G069146	GRMZM2G399383	GRMZM2G082199
GRMZM2G128560	GRMZM2G377904	GRMZM2G334165
GRMZM2G053868	GRMZM2G028086	GRMZM2G046900
GRMZM2G032602	GRMZM2G405662	GRMZM2G444567
GRMZM2G174396	GRMZM2G350773	GRMZM2G343317
GRMZM2G097704	GRMZM2G024865	GRMZM2G464393
GRMZM2G104655	GRMZM2G431156	GRMZM2G307152
GRMZM2G079682	GRMZM2G053507	GRMZM2G050734
GRMZM2G107031	GRMZM2G022629	GRMZM2G134334
GRMZM5G801949	GRMZM2G007306	GRMZM2G115357
GRMZM2G001930	GRMZM2G496991	GRMZM2G172264
GRMZM2G057506	GRMZM2G131315	GRMZM2G159937
GRMZM2G115491	GRMZM2G022931	GRMZM2G148087
GRMZM2G054361	GRMZM5G845782	GRMZM2G340578
GRMZM2G069511	XLOC_021436	GRMZM2G171600
GRMZM2G071277	GRMZM2G021095	GRMZM2G162396
GRMZM2G028286	GRMZM2G057113	XLOC_020236
GRMZM2G146108	GRMZM2G003506	GRMZM2G033098
GRMZM2G057116	GRMZM2G120001	GRMZM5G812326
GRMZM2G072529	GRMZM2G057672	GRMZM2G082580
GRMZM2G066158	GRMZM2G041344	GRMZM2G324999
GRMZM2G069528	GRMZM2G444819	GRMZM2G072814
GRMZM2G163200	GRMZM5G893912	GRMZM5G855994
GRMZM2G013776	GRMZM2G434170	GRMZM2G126749
GRMZM2G088819	GRMZM2G427697	GRMZM2G420883
XLOC_009308	GRMZM2G017792	GRMZM2G137286
GRMZM2G379540	GRMZM2G176780	GRMZM2G057466
GRMZM2G132095	GRMZM2G116614	GRMZM2G018673
GRMZM2G000520	GRMZM2G386674	GRMZM2G040840
GRMZM2G123104	GRMZM2G151257	GRMZM2G112629
GRMZM5G882986	GRMZM2G004422	GRMZM2G054807
GRMZM2G148074	GRMZM2G413337	GRMZM2G179147
GRMZM2G479529	GRMZM2G068967	GRMZM2G430995
GRMZM5G810393	GRMZM2G333980	GRMZM2G049912
GRMZM2G098517	GRMZM2G067727	GRMZM2G055982
AC208201.3_FG002	GRMZM2G023436	GRMZM2G133653
GRMZM2G054912	GRMZM2G068239	GRMZM2G098637
GRMZM5G860176	GRMZM2G061723	GRMZM2G174347
GRMZM2G011110	GRMZM2G030305	GRMZM2G025895
GRMZM2G024530	GRMZM2G005825	GRMZM2G134023
GRMZM2G005954	GRMZM2G120539	GRMZM2G117007
GRMZM2G073250	GRMZM2G323387	GRMZM2G379005
GRMZM2G076868	GRMZM2G172485	GRMZM2G066428
GRMZM2G438960	GRMZM2G177227	GRMZM2G441541
GRMZM2G042838	GRMZM2G059428	GRMZM2G042756
GRMZM2G104843	XLOC_021616	GRMZM2G122276
GRMZM2G060837	AC209050.3_FG003	GRMZM2G448330
GRMZM2G026171	GRMZM2G036703	GRMZM2G054900
GRMZM2G093962	GRMZM2G152461	GRMZM2G301089
GRMZM5G853717	GRMZM2G469828
GRMZM2G135783	AC191804.4_FG002
GRMZM2G041175	GRMZM2G569948
GRMZM2G158328	GRMZM2G120320
GRMZM2G137341	AC225718.2_FG009
GRMZM2G177356	GRMZM2G140669
GRMZM2G149935	GRMZM2G366910
GRMZM2G142779	GRMZM2G362823
GRMZM2G462118	GRMZM2G081957
GRMZM2G117250	GRMZM2G082709
GRMZM2G099067	GRMZM2G326933
GRMZM2G037189	AC205471.4_FG003
GRMZM2G079616	GRMZM2G166639
GRMZM2G449257	GRMZM2G145412
GRMZM2G009735	GRMZM2G060712
GRMZM2G180920	GRMZM2G402564
GRMZM2G130943	GRMZM2G107565
GRMZM2G089995	GRMZM2G066197
GRMZM6G287292	GRMZM2G168404
GRMZM2G059299	GRMZM2G325238
GRMZM2G139512	GRMZM2G180211
GRMZM2G328258	GRMZM2G023237
GRMZM2G380432	AC193319.3_FG004
GRMZM2G447347	GRMZM2G032766
GRMZM2G040736	GRMZM2G086841
GRMZM2G104836	GRMZM2G444621
GRMZM2G027068	GRMZM2G076584
GRMZM2G437912	GRMZM2G035103
GRMZM2G027958	GRMZM2G002815
GRMZM2G080992	GRMZM2G031447
GRMZM2G317614	GRMZM2G432060
GRMZM2G162739	GRMZM2G176605
GRMZM2G127857	GRMZM2G177340
GRMZM2G100288	XLOC_038825
GRMZM2G477491	GRMZM2G017013
GRMZM2G013986	GRMZM2G153527
GRMZM2G157115	GRMZM2G107101
GRMZM2G173862	GRMZM2G373124
GRMZM2G090594	GRMZM2G103152
GRMZM5G880069	GRMZM2G106190
GRMZM2G082199	GRMZM2G016521
GRMZM2G334165	GRMZM2G130904
GRMZM2G046900	GRMZM2G180086
GRMZM2G444567	GRMZM2G065498
GRMZM2G343317	GRMZM2G081175
GRMZM2G464393	GRMZM2G110145
GRMZM2G307152	GRMZM2G113794
GRMZM2G050734	GRMZM2G435592
GRMZM2G134334	GRMZM2G032160
GRMZM2G115357	GRMZM2G106819
GRMZM2G099297	GRMZM2G163054
GRMZM2G172264	GRMZM2G074792
GRMZM2G159937	GRMZM2G377215
GRMZM2G148087	GRMZM2G106792
GRMZM2G340578	GRMZM2G123977
GRMZM2G122712	GRMZM5G854625
GRMZM2G171600	GRMZM2G423669
GRMZM2G023081	GRMZM5G862956
GRMZM2G162396	GRMZM2G141133
GRMZM2G158045	GRMZM2G020150
XLOC_020236	GRMZM2G176307
GRMZM2G176489	GRMZM2G069082
GRMZM5G806638	AC210204.3_FG002
GRMZM2G331393	GRMZM2G075712
GRMZM2G033098	GRMZM2G312201
GRMZM5G812326	GRMZM2G392125
GRMZM2G082580	GRMZM2G317426
GRMZM2G324999	GRMZM2G428379
GRMZM2G072814	GRMZM2G069018
GRMZM5G855994	GRMZM2G016264
GRMZM2G126749	GRMZM2G074358
GRMZM2G420883	GRMZM2G006216
GRMZM2G137286	GRMZM2G127537
GRMZM5G862467	GRMZM2G367094
GRMZM2G057466	GRMZM2G077809
GRMZM2G018673	GRMZM2G125923
GRMZM2G157219	GRMZM2G149024
GRMZM2G040840	GRMZM2G036262
GRMZM2G112629	GRMZM2G055698
GRMZM2G054807	GRMZM2G006429
GRMZM2G179147	GRMZM2G141353
GRMZM2G430995	GRMZM2G099767
GRMZM2G166944	GRMZM2G160838
GRMZM2G049912	GRMZM2G366130
GRMZM2G091233	GRMZM2G028266
GRMZM5G897473	XLOC_005112
GRMZM2G118366	GRMZM2G470422
GRMZM2G113060	GRMZM2G167613
GRMZM2G084264	GRMZM5G819464
GRMZM2G055982	GRMZM2G471367
GRMZM2G149201	GRMZM2G436593
GRMZM2G133653	GRMZM2G027499
GRMZM2G098637	GRMZM2G051785
GRMZM2G174347	GRMZM2G123667
GRMZM2G025895	GRMZM2G146616
GRMZM2G134023	GRMZM5G847466
GRMZM2G176182	GRMZM2G044537
GRMZM2G370745	GRMZM2G174315
GRMZM2G117007	GRMZM2G105466
GRMZM2G379005	XLOC_022979
GRMZM2G066428	GRMZM2G369472
GRMZM2G117956	GRMZM2G079632
GRMZM2G441541	GRMZM2G176403
GRMZM2G042756	GRMZM2G375159
GRMZM2G122276	GRMZM2G081782
GRMZM2G448330	GRMZM2G051619
GRMZM2G054900	GRMZM2G046297
GRMZM2G301089	GRMZM2G381404
	GRMZM2G426046
	GRMZM2G138370
	GRMZM2G301934
	GRMZM2G079323
	GRMZM2G169558
	GRMZM2G045178
	GRMZM2G176630
	GRMZM2G136344
	GRMZM2G065928
	GRMZM2G094768
	GRMZM2G478553
	GRMZM2G052796
	GRMZM2G066041
	GRMZM5G853245
	GRMZM2G146020
	GRMZM2G467184
	GRMZM2G067298
	GRMZM5G853392
	GRMZM2G069146
	GRMZM2G128560
	GRMZM2G362413
	GRMZM2G053868
	GRMZM2G145444
	GRMZM2G032602
	GRMZM5G827121
	GRMZM2G404603
	GRMZM5G881649
	GRMZM2G174396
	GRMZM2G097704
	GRMZM2G104655
	GRMZM2G079682
	XLOC_043654
	GRMZM2G161233
	GRMZM2G107031
	GRMZM2G083894
	GRMZM2G001930
	GRMZM2G099425
	GRMZM2G057506
	GRMZM2G054361
	GRMZM2G073465
	GRMZM2G069511
	GRMZM2G354804
	GRMZM2G169020
	GRMZM2G015892
	GRMZM2G157241
	GRMZM2G082346
	GRMZM2G071277
	GRMZM2G028286
	GRMZM2G063679
	GRMZM2G067299
	GRMZM2G146108
	GRMZM2G057116
	GRMZM2G072529
	GRMZM2G066158
	GRMZM2G059496
	GRMZM2G163200
	GRMZM2G013776
	GRMZM2G088819
	GRMZM2G001577
	GRMZM2G017197
	XLOC_009308
	GRMZM2G379540
	GRMZM2G173965
	GRMZM2G073303
	GRMZM2G424804
	GRMZM2G305362
	GRMZM2G000520
	XLOC_040733
	GRMZM2G123104
	AC206223.3_FG008
	GRMZM5G882986
	GRMZM2G148074
	GRMZM2G080103
	GRMZM2G479529
	GRMZM2G101405
	GRMZM2G115422
	GRMZM2G306616
	GRMZM2G098517
	AC208201.3_FG002
	GRMZM2G054912
	GRMZM5G860176
	GRMZM2G024530
	GRMZM2G073250
	GRMZM2G076868
	GRMZM2G112244
	GRMZM2G061447
	GRMZM2G031504
	GRMZM2G042838
	GRMZM2G104843
	GRMZM2G060837
	GRMZM2G026171
	GRMZM2G175642
	GRMZM2G093962
	GRMZM2G092752
	GRMZM2G404608
	GRMZM2G041424
	GRMZM2G176472
	GRMZM2G152739
	GRMZM2G083526
	GRMZM2G041175
	GRMZM2G414727
	GRMZM2G158328
	GRMZM2G137341
	GRMZM2G050697
	GRMZM2G103197
	GRMZM2G177356
	GRMZM2G149935
	GRMZM2G142779
	GRMZM2G462118
	GRMZM2G099067
	GRMZM2G037189
	GRMZM2G031580
	GRMZM2G458494
	GRMZM2G051151
	GRMZM2G079616
	GRMZM2G133434
	GRMZM2G130943
	GRMZM2G089995
	GRMZM6G287292
	GRMZM2G413460
	GRMZM2G457003
	GRMZM2G139512
	GRMZM5G850019
	GRMZM2G380432
	GRMZM2G174310
	GRMZM2G465430
	GRMZM2G447347
	GRMZM2G104836
	GRMZM2G043095
	GRMZM2G437912
	GRMZM2G027958
	GRMZM2G080992
	GRMZM2G060257
	GRMZM2G317614
	GRMZM2G162739
	GRMZM2G127857
	GRMZM2G382569
	GRMZM2G100288
	XLOC_010381
	GRMZM2G157115
	GRMZM2G090594
	GRMZM2G130764
	GRMZM2G082199
	GRMZM2G334165
	GRMZM2G151521
	GRMZM2G050514
	GRMZM2G112617
	GRMZM2G046900
	GRMZM5G868355
	GRMZM2G320827
	GRMZM2G103945
	GRMZM2G444567
	GRMZM2G015610
	GRMZM2G471357
	GRMZM2G343317
	GRMZM2G414047
	GRMZM2G175761
	GRMZM2G046317
	GRMZM2G464393
	GRMZM2G307152
	GRMZM2G050734
	GRMZM2G134334
	GRMZM2G096211
	GRMZM2G339736
	GRMZM2G115357
	GRMZM2G172264
	GRMZM2G159937
	GRMZM2G148087
	AC159612.1_FG007
	GRMZM2G340578
	GRMZM2G171600
	GRMZM2G162396
	XLOC_020236
	GRMZM2G020478
	GRMZM5G837822
	GRMZM2G033098
	GRMZM5G812326
	AC220927.3_FG001
	GRMZM2G053111
	GRMZM2G082580
	GRMZM2G324999
	GRMZM2G072814
	GRMZM2G049185
	GRMZM5G855994
	GRMZM2G126749
	GRMZM2G420883
	GRMZM2G381453
	GRMZM2G155877
	GRMZM2G137286
	GRMZM2G057466
	GRMZM2G012224
	GRMZM2G067865
	GRMZM2G095778
	GRMZM2G097081
	GRMZM2G127308
	GRMZM2G359904
	GRMZM2G010202
	GRMZM2G018673
	GRMZM2G156824
	GRMZM2G175870
	GRMZM2G001332
	GRMZM2G148237
	GRMZM2G040840
	GRMZM2G112629
	GRMZM2G069773
	GRMZM2G375307
	GRMZM2G025109
	GRMZM2G054807
	GRMZM2G179147
	GRMZM2G430995
	GRMZM2G049912
	GRMZM2G052720
	GRMZM2G480364
	GRMZM2G159759
	GRMZM2G059526
	GRMZM2G321239
	GRMZM2G453575
	GRMZM2G061537
	GRMZM2G177867
	GRMZM2G055982
	GRMZM2G174558
	GRMZM2G133653
	GRMZM2G098637
	GRMZM2G174347
	GRMZM2G025895
	GRMZM2G087827
	GRMZM2G078887
	GRMZM2G134023
	GRMZM2G027726
	GRMZM2G073197
	GRMZM2G078820
	GRMZM2G047422
	GRMZM2G165060
	GRMZM2G117007
	GRMZM2G379005
	GRMZM2G045431
	GRMZM2G066428
	GRMZM2G003937
	GRMZM2G441541
	GRMZM2G342856
	GRMZM2G389582
	GRMZM2G042756
	GRMZM2G377862
	GRMZM2G122276
	GRMZM2G448330
	GRMZM2G085892
	GRMZM2G054900
	GRMZM2G301089
