# Supplementary material for: Transcriptomic Analysis Reveals Candidate Genes Responding Maize Gray Leaf Spot Caused by Cercospora zeina
Source: Plants (Basel). 2021 Oct 22;10(11):2257. doi: 10.3390/plants10112257 (PMC8625984; doi:10.3390/plants10112257)
Supplement: Supplementary file 1 [file plants-10-02257-s001.zip › Table S3.xlsx]

## Sheet: Sheet1
Module	Gene_count	DEG_R6	DEG_S8	Total_DEG
yellowgreen	182	0	2	2
darkolivegreen	409	0	0	0
palevioletred2	524	0	0	0
greenyellow	852	5	0	5
darkturquoise	212	1	0	1
brown4	697	0	0	0
deeppink	840	7	1	7
black	1668	13	3	15
purple	390	113	127	164
magenta	876	6	0	6
floralwhite	1442	8	3	10
coral	513	4	1	5
coral3	608	2	0	2
lightsteelblue1	171	0	0	0
orange	611	3	3	6
brown2	280	1	0	1
magenta4	426	2	4	5
grey60	1027	420	241	445
darkmagenta	554	0	1	1
darkslateblue	312	1	0	1
lavenderblush2	87	0	0	0
pink4	72	0	0	0
mediumpurple4	368	0	0	0
green	831	1	1	2
darkolivegreen4	98	0	0	0
blue	1230	4	1	5
coral1	273	0	0	0
bisque4	538	3	1	4
maroon	195	0	0	0
antiquewhite2	269	0	0	0
thistle1	316	0	0	0
mediumorchid	183	1	0	1
honeydew1	365	0	0	0
magenta3	164	0	0	0
skyblue2	109	0	0	0
lightpink2	41	0	0	0
tan	417	0	0	0
mediumpurple3	171	1	1	2
orangered1	70	0	0	0
coral2	112	0	0	0
navajowhite	99	0	0	0
lightcoral	100	0	0	0
sienna4	72	0	0	0
indianred4	99	0	0	0
