# Supplementary material for: Transcriptomic Analysis Reveals Candidate Genes Responding Maize Gray Leaf Spot Caused by Cercospora zeina
Source: Plants (Basel). 2021 Oct 22;10(11):2257. doi: 10.3390/plants10112257 (PMC8625984; doi:10.3390/plants10112257)
Supplement: Supplementary file 1 [file plants-10-02257-s001.zip › Table S4.xlsx]

## Sheet: Sheet1
Module	GO_acc	term_type	Term	queryitem	querytotal	bgitem	bgtotal	pvalue	FDR
black	GO:0009628	P	response to abiotic stimulus	359	1668	5910	39469	2.1e-12	7.7e-10
black	GO:0006950	P	response to stress	600	1668	11399	39469	5.4e-10	9.9e-08
black	GO:0009719	P	response to endogenous stimulus	298	1668	5149	39469	2.8e-08	3.5e-06
black	GO:0006810	P	transport	496	1668	9460	39469	7.8e-08	5.5e-06
black	GO:0051234	P	establishment of localization	529	1668	10171	39469	6.2e-08	5.5e-06
black	GO:0009056	P	catabolic process	314	1668	5550	39469	8.9e-08	5.5e-06
black	GO:0009991	P	response to extracellular stimulus	102	1668	1386	39469	2e-07	1e-05
black	GO:0051179	P	localization	616	1668	12243	39469	2.8e-07	1.3e-05
black	GO:0006629	P	lipid metabolic process	230	1668	3959	39469	1.1e-06	4.7e-05
black	GO:0009605	P	response to external stimulus	282	1668	5210	39469	1.4e-05	0.00051
black	GO:0065008	P	regulation of biological quality	243	1668	4443	39469	3.2e-05	0.0011
black	GO:0050896	P	response to stimulus	1003	1668	21792	39469	3.9e-05	0.0012
black	GO:0007154	P	cell communication	436	1668	8894	39469	0.00038	0.011
black	GO:0008219	P	cell death	128	1668	2283	39469	0.0011	0.03
black	GO:0009791	P	post-embryonic development	235	1668	4609	39469	0.0019	0.047
black	GO:0003824	F	catalytic activity	1377	1668	30590	39469	3.7e-07	4.2e-05
black	GO:0008289	F	lipid binding	36	1668	427	39469	0.00017	0.0066
black	GO:0005515	F	protein binding	206	1668	3768	39469	0.00014	0.0066
black	GO:0044424	C	intracellular part	1491	1668	31794	39469	5.1e-22	1.2e-19
black	GO:0005622	C	intracellular	1496	1668	31989	39469	1.5e-21	1.7e-19
black	GO:0044464	C	cell part	1537	1668	33355	39469	2.4e-20	1.4e-18
black	GO:0005623	C	cell	1537	1668	33355	39469	2.4e-20	1.4e-18
black	GO:0005737	C	cytoplasm	1402	1668	29454	39469	5e-20	2.2e-18
black	GO:0043231	C	intracellular membrane-bounded organelle	1360	1668	28373	39469	2e-19	7.5e-18
black	GO:0043227	C	membrane-bounded organelle	1364	1668	28520	39469	4.3e-19	1.4e-17
black	GO:0043229	C	intracellular organelle	1391	1668	29451	39469	1.9e-17	5.2e-16
black	GO:0043226	C	organelle	1395	1668	29603	39469	4.2e-17	1e-15
black	GO:0044444	C	cytoplasmic part	1057	1668	21511	39469	4.1e-13	9.2e-12
black	GO:0016020	C	membrane	1006	1668	20299	39469	5.6e-13	1.1e-11
black	GO:0005829	C	cytosol	272	1668	4267	39469	2.1e-11	3.9e-10
black	GO:0012505	C	endomembrane system	607	1668	11356	39469	2.9e-11	5e-10
black	GO:0005783	C	endoplasmic reticulum	295	1668	5027	39469	9.6e-09	1.5e-07
black	GO:0005773	C	vacuole	279	1668	4772	39469	3.7e-08	5.6e-07
black	GO:0044422	C	organelle part	918	1668	19127	39469	8.1e-08	1.1e-06
black	GO:0005794	C	Golgi apparatus	226	1668	3840	39469	5.9e-07	7.8e-06
black	GO:0005634	C	nucleus	941	1668	19880	39469	7.2e-07	9e-06
black	GO:0005886	C	plasma membrane	466	1668	9068	39469	2.3e-06	2.7e-05
black	GO:0005768	C	endosome	126	1668	1929	39469	2.7e-06	3.1e-05
black	GO:0005777	C	peroxisome	41	1668	464	39469	2.4e-05	0.00024
black	GO:0042579	C	microbody	41	1668	464	39469	2.4e-05	0.00024
black	GO:0044446	C	intracellular organelle part	818	1668	17383	39469	3.3e-05	0.00032
darkmagenta	GO:0009719	P	response to endogenous stimulus	116	554	5149	39469	2.1e-07	7.8e-05
darkmagenta	GO:0042592	P	homeostatic process	51	554	1707	39469	6.6e-07	8e-05
darkmagenta	GO:0065008	P	regulation of biological quality	102	554	4443	39469	6.1e-07	8e-05
darkmagenta	GO:0050896	P	response to stimulus	359	554	21792	39469	3.3e-06	0.0003
darkmagenta	GO:0009056	P	catabolic process	116	554	5550	39469	7.9e-06	0.00057
darkmagenta	GO:0009628	P	response to abiotic stimulus	120	554	5910	39469	2e-05	0.0012
darkmagenta	GO:0019748	P	secondary metabolic process	55	554	2187	39469	3.2e-05	0.0017
darkmagenta	GO:0009605	P	response to external stimulus	107	554	5210	39469	4e-05	0.0018
darkmagenta	GO:0006810	P	transport	172	554	9460	39469	9.9e-05	0.004
darkmagenta	GO:0006950	P	response to stress	201	554	11399	39469	0.00011	0.004
darkmagenta	GO:0019725	P	cellular homeostasis	29	554	965	39469	0.00016	0.0053
darkmagenta	GO:0007154	P	cell communication	161	554	8894	39469	0.00023	0.007
darkmagenta	GO:0051234	P	establishment of localization	179	554	10171	39469	0.00038	0.01
darkmagenta	GO:0050794	P	regulation of cellular process	294	554	18086	39469	0.00041	0.01
darkmagenta	GO:0051179	P	localization	206	554	12243	39469	0.0012	0.03
darkmagenta	GO:0005215	F	transporter activity	74	554	2961	39469	1.5e-06	0.00016
darkmagenta	GO:0003824	F	catalytic activity	462	554	30590	39469	0.0004	0.021
darkmagenta	GO:0005886	C	plasma membrane	198	554	9068	39469	1.1e-11	2.5e-09
darkmagenta	GO:0044464	C	cell part	519	554	33355	39469	3.6e-11	2.6e-09
darkmagenta	GO:0005623	C	cell	519	554	33355	39469	3.6e-11	2.6e-09
darkmagenta	GO:0044424	C	intracellular part	500	554	31794	39469	4.2e-10	2.3e-08
darkmagenta	GO:0043226	C	organelle	475	554	29603	39469	5.5e-10	2.4e-08
darkmagenta	GO:0043229	C	intracellular organelle	471	554	29451	39469	2.5e-09	7.8e-08
darkmagenta	GO:0005622	C	intracellular	500	554	31989	39469	2.2e-09	7.8e-08
darkmagenta	GO:0043231	C	intracellular membrane-bounded organelle	456	554	28373	39469	9.5e-09	2.1e-07
darkmagenta	GO:0043227	C	membrane-bounded organelle	458	554	28520	39469	8.3e-09	2.1e-07
darkmagenta	GO:0005737	C	cytoplasm	469	554	29454	39469	9.3e-09	2.1e-07
darkmagenta	GO:0016020	C	membrane	337	554	20299	39469	6.1e-06	0.00012
darkmagenta	GO:0005773	C	vacuole	98	554	4772	39469	9.1e-05	0.0015
darkmagenta	GO:0012505	C	endomembrane system	201	554	11356	39469	8.8e-05	0.0015
darkmagenta	GO:0044444	C	cytoplasmic part	343	554	21511	39469	0.00027	0.0043
darkmagenta	GO:0005634	C	nucleus	319	554	19880	39469	0.00043	0.0062
darkolivegreen	GO:0009628	P	response to abiotic stimulus	117	409	5910	39469	2e-12	6.9e-10
darkolivegreen	GO:0006950	P	response to stress	164	409	11399	39469	8.8e-07	0.00016
darkolivegreen	GO:0044249	P	cellular biosynthetic process	223	409	17273	39469	8.8e-06	0.001
darkolivegreen	GO:0009791	P	post-embryonic development	76	409	4609	39469	3.5e-05	0.0031
darkolivegreen	GO:0009605	P	response to external stimulus	83	409	5210	39469	4.7e-05	0.0034
darkolivegreen	GO:0009058	P	biosynthetic process	237	409	19197	39469	0.00011	0.0064
darkolivegreen	GO:0009991	P	response to extracellular stimulus	30	409	1386	39469	0.00017	0.0071
darkolivegreen	GO:0019222	P	regulation of metabolic process	153	409	11538	39469	0.00025	0.0071
darkolivegreen	GO:0050789	P	regulation of biological process	256	409	21285	39469	0.00026	0.0071
darkolivegreen	GO:0010468	P	regulation of gene expression	103	409	7141	39469	0.00024	0.0071
darkolivegreen	GO:0048608	P	reproductive structure development	60	409	3593	39469	0.00019	0.0071
darkolivegreen	GO:0060255	P	regulation of macromolecule metabolic process	122	409	8796	39469	0.00026	0.0071
darkolivegreen	GO:0050794	P	regulation of cellular process	224	409	18086	39469	0.00019	0.0071
darkolivegreen	GO:0022414	P	reproductive process	85	409	5718	39469	0.00038	0.0097
darkolivegreen	GO:0000003	P	reproduction	89	409	6076	39469	0.00044	0.01
darkolivegreen	GO:0065007	P	biological regulation	269	409	22769	39469	0.00053	0.012
darkolivegreen	GO:0007049	P	cell cycle	52	409	3210	39469	0.001	0.022
darkolivegreen	GO:0003006	P	developmental process involved in reproduction	69	409	4641	39469	0.0015	0.029
darkolivegreen	GO:0032501	P	multicellular organismal process	216	409	17974	39469	0.002	0.037
darkolivegreen	GO:0009908	P	flower development	34	409	1940	39469	0.0024	0.043
darkolivegreen	GO:0005515	F	protein binding	64	409	3768	39469	7.1e-05	0.0065
darkolivegreen	GO:0003700	F	transcription factor activity, sequence-specific DNA binding	31	409	1435	39469	0.00014	0.0065
darkolivegreen	GO:0043231	C	intracellular membrane-bounded organelle	356	409	28373	39469	2.1e-13	2.3e-11
darkolivegreen	GO:0043229	C	intracellular organelle	364	409	29451	39469	3.7e-13	2.3e-11
darkolivegreen	GO:0043227	C	membrane-bounded organelle	357	409	28520	39469	2.5e-13	2.3e-11
darkolivegreen	GO:0043226	C	organelle	365	409	29603	39469	4.5e-13	2.3e-11
darkolivegreen	GO:0044464	C	cell part	391	409	33355	39469	1.2e-12	4.3e-11
darkolivegreen	GO:0005623	C	cell	391	409	33355	39469	1.2e-12	4.3e-11
darkolivegreen	GO:0005622	C	intracellular	378	409	31989	39469	8.2e-11	2.5e-09
darkolivegreen	GO:0044424	C	intracellular part	376	409	31794	39469	1.4e-10	3.8e-09
darkolivegreen	GO:0005737	C	cytoplasm	354	409	29454	39469	2.9e-09	6.7e-08
darkolivegreen	GO:0005634	C	nucleus	257	409	19880	39469	2.9e-07	6.1e-06
darkolivegreen	GO:0044422	C	organelle part	248	409	19127	39469	5.8e-07	1.1e-05
darkolivegreen	GO:0044444	C	cytoplasmic part	269	409	21511	39469	2.7e-06	4.6e-05
darkolivegreen	GO:0044446	C	intracellular organelle part	226	409	17383	39469	3.8e-06	6.1e-05
darkolivegreen	GO:0009536	C	plastid	158	409	11216	39469	6.1e-06	9.1e-05
darkolivegreen	GO:0031981	C	nuclear lumen	102	409	6973	39469	0.00015	0.0021
darkolivegreen	GO:0005886	C	plasma membrane	126	409	9068	39469	0.00018	0.0023
darkolivegreen	GO:0005783	C	endoplasmic reticulum	78	409	5027	39469	0.0002	0.0024
darkolivegreen	GO:0044428	C	nuclear part	111	409	7833	39469	0.00024	0.0028
darkolivegreen	GO:0005654	C	nucleoplasm	76	409	5067	39469	0.00065	0.0071
darkolivegreen	GO:0000323	C	lytic vacuole	14	409	481	39469	0.00068	0.0071
darkolivegreen	GO:0031975	C	envelope	68	409	4553	39469	0.0014	0.014
darkolivegreen	GO:0031974	C	membrane-enclosed lumen	105	409	7724	39469	0.0016	0.015
darkolivegreen	GO:0043233	C	organelle lumen	105	409	7714	39469	0.0016	0.015
darkolivegreen	GO:0005829	C	cytosol	64	409	4267	39469	0.0018	0.015
darkolivegreen	GO:0070013	C	intracellular organelle lumen	103	409	7566	39469	0.0018	0.015
darkolivegreen	GO:0016020	C	membrane	238	409	20299	39469	0.0037	0.03
darkolivegreen	GO:0031967	C	organelle envelope	60	409	4076	39469	0.0039	0.03
darkolivegreen	GO:0005739	C	mitochondrion	104	409	7913	39469	0.005	0.037
darkolivegreen4	GO:0009607	P	response to biotic stimulus	25	98	3846	39469	5.9e-06	0.0017
darkolivegreen4	GO:0009605	P	response to external stimulus	28	98	5210	39469	4.9e-05	0.0069
darkolivegreen4	GO:0051704	P	multi-organism process	29	98	5934	39469	0.00019	0.018
darkolivegreen4	GO:0016301	F	kinase activity	23	98	3498	39469	1.3e-05	0.00048
darkolivegreen4	GO:0016740	F	transferase activity	55	98	14227	39469	4.1e-05	0.00077
darkolivegreen4	GO:0016772	F	transferase activity, transferring phosphorus-containing groups	27	98	5072	39469	8.2e-05	0.001
darkolivegreen4	GO:0000166	F	nucleotide binding	30	98	6171	39469	0.00015	0.0014
darkolivegreen4	GO:0003824	F	catalytic activity	89	98	30590	39469	0.00049	0.0037
darkolivegreen4	GO:0012505	C	endomembrane system	54	98	11356	39469	4.7e-08	8e-06
darkolivegreen4	GO:0005794	C	Golgi apparatus	27	98	3840	39469	4.9e-07	4.2e-05
darkolivegreen4	GO:0005783	C	endoplasmic reticulum	29	98	5027	39469	8.8e-06	0.00045
darkolivegreen4	GO:0005886	C	plasma membrane	42	98	9068	39469	1e-05	0.00045
darkolivegreen4	GO:0016020	C	membrane	70	98	20299	39469	4.5e-05	0.0015
darkolivegreen4	GO:0005768	C	endosome	14	98	1929	39469	0.00031	0.0088
darkolivegreen4	GO:0005737	C	cytoplasm	87	98	29454	39469	0.00043	0.01
darkolivegreen4	GO:0044464	C	cell part	93	98	33355	39469	0.0013	0.025
darkolivegreen4	GO:0005623	C	cell	93	98	33355	39469	0.0013	0.025
greenyellow	GO:0009607	P	response to biotic stimulus	132	852	3846	39469	1.3e-07	4.1e-05
greenyellow	GO:0005975	P	carbohydrate metabolic process	128	852	3739	39469	2.3e-07	4.1e-05
greenyellow	GO:0051704	P	multi-organism process	183	852	5934	39469	4.6e-07	5.4e-05
greenyellow	GO:0009605	P	response to external stimulus	159	852	5210	39469	5.7e-06	0.00051
greenyellow	GO:0006950	P	response to stress	302	852	11399	39469	2.4e-05	0.0012
greenyellow	GO:0006810	P	transport	258	852	9460	39469	1.9e-05	0.0012
greenyellow	GO:0051234	P	establishment of localization	274	852	10171	39469	2.2e-05	0.0012
greenyellow	GO:0051179	P	localization	312	852	12243	39469	0.00032	0.014
greenyellow	GO:0009056	P	catabolic process	156	852	5550	39469	0.00039	0.015
greenyellow	GO:0009875	P	pollen-pistil interaction	8	852	85	39469	0.00081	0.029
greenyellow	GO:0009628	P	response to abiotic stimulus	162	852	5910	39469	0.00089	0.029
greenyellow	GO:0009991	P	response to extracellular stimulus	48	852	1386	39469	0.0013	0.039
greenyellow	GO:0050896	P	response to stimulus	514	852	21792	39469	0.0016	0.044
greenyellow	GO:0003824	F	catalytic activity	708	852	30590	39469	3.9e-05	0.0041
greenyellow	GO:0005215	F	transporter activity	94	852	2961	39469	0.00017	0.0087
greenyellow	GO:0016301	F	kinase activity	105	852	3498	39469	0.00049	0.017
greenyellow	GO:0044444	C	cytoplasmic part	584	852	21511	39469	8.7e-17	2e-14
greenyellow	GO:0005783	C	endoplasmic reticulum	191	852	5027	39469	1e-14	7.7e-13
greenyellow	GO:0012505	C	endomembrane system	352	852	11356	39469	7.3e-15	7.7e-13
greenyellow	GO:0005773	C	vacuole	180	852	4772	39469	1.5e-13	8.2e-12
greenyellow	GO:0016020	C	membrane	541	852	20299	39469	1.4e-12	6.2e-11
greenyellow	GO:0043229	C	intracellular organelle	715	852	29451	39469	6.1e-11	2.3e-09
greenyellow	GO:0043231	C	intracellular membrane-bounded organelle	694	852	28373	39469	9.6e-11	3.1e-09
greenyellow	GO:0043226	C	organelle	716	852	29603	39469	1.7e-10	4.8e-09
greenyellow	GO:0043227	C	membrane-bounded organelle	695	852	28520	39469	2.5e-10	6.2e-09
greenyellow	GO:0005737	C	cytoplasm	709	852	29454	39469	1.7e-09	3.7e-08
greenyellow	GO:0005576	C	extracellular region	114	852	2963	39469	3.4e-09	7e-08
greenyellow	GO:0044464	C	cell part	777	852	33355	39469	7e-09	1.2e-07
greenyellow	GO:0005623	C	cell	777	852	33355	39469	7e-09	1.2e-07
greenyellow	GO:0005886	C	plasma membrane	266	852	9068	39469	2.9e-08	4.7e-07
greenyellow	GO:0005794	C	Golgi apparatus	131	852	3840	39469	2e-07	2.9e-06
greenyellow	GO:0044424	C	intracellular part	742	852	31794	39469	3.6e-07	5e-06
greenyellow	GO:0005622	C	intracellular	745	852	31989	39469	4.8e-07	6.4e-06
greenyellow	GO:0031012	C	extracellular matrix	19	852	240	39469	3.2e-06	4e-05
greenyellow	GO:0030312	C	external encapsulating structure	86	852	2409	39469	6.2e-06	7.3e-05
greenyellow	GO:0005618	C	cell wall	78	852	2125	39469	6.7e-06	7.5e-05
greenyellow	GO:0044422	C	organelle part	470	852	19127	39469	6.2e-05	0.00066
greenyellow	GO:0005739	C	mitochondrion	216	852	7913	39469	0.00012	0.0012
greenyellow	GO:0044446	C	intracellular organelle part	429	852	17383	39469	0.00015	0.0014
greenyellow	GO:0031975	C	envelope	133	852	4553	39469	0.00025	0.0024
greenyellow	GO:0005829	C	cytosol	125	852	4267	39469	0.00036	0.0032
greenyellow	GO:0031967	C	organelle envelope	120	852	4076	39469	0.00039	0.0034
greenyellow	GO:0009536	C	plastid	279	852	11216	39469	0.0035	0.029
grey60	GO:0009719	P	response to endogenous stimulus	295	1027	5149	39469	9e-39	3.2e-36
grey60	GO:0007165	P	signal transduction	354	1027	7659	39469	4.5e-29	8.2e-27
grey60	GO:0051704	P	multi-organism process	290	1027	5934	39469	1.4e-26	1.7e-24
grey60	GO:0006950	P	response to stress	457	1027	11399	39469	9.2e-26	7.8e-24
grey60	GO:0007154	P	cell communication	382	1027	8894	39469	1.1e-25	7.8e-24
grey60	GO:0009607	P	response to biotic stimulus	214	1027	3846	39469	1.5e-25	9e-24
grey60	GO:0009605	P	response to external stimulus	250	1027	5210	39469	1.9e-21	9.6e-20
grey60	GO:0050896	P	response to stimulus	713	1027	21792	39469	2.3e-20	1.1e-18
grey60	GO:0009628	P	response to abiotic stimulus	264	1027	5910	39469	1.1e-18	4.3e-17
grey60	GO:0008219	P	cell death	125	1027	2283	39469	2.4e-14	8.5e-13
grey60	GO:0050789	P	regulation of biological process	664	1027	21285	39469	3.9e-12	1.3e-10
grey60	GO:0050794	P	regulation of cellular process	580	1027	18086	39469	9.3e-12	2.8e-10
grey60	GO:0007275	P	multicellular organism development	497	1027	15387	39469	9.7e-10	2.7e-08
grey60	GO:0009856	P	pollination	63	1027	1054	39469	4.3e-09	1.1e-07
grey60	GO:0048856	P	anatomical structure development	520	1027	16536	39469	1.6e-08	3.8e-07
grey60	GO:0016049	P	cell growth	98	1027	2097	39469	4.7e-08	1.1e-06
grey60	GO:0006464	P	cellular protein modification process	258	1027	7223	39469	5.3e-08	1.1e-06
grey60	GO:0065007	P	biological regulation	676	1027	22769	39469	8.3e-08	1.7e-06
grey60	GO:0032501	P	multicellular organismal process	551	1027	17974	39469	1.6e-07	3.1e-06
grey60	GO:0000003	P	reproduction	219	1027	6076	39469	4.2e-07	7.5e-06
grey60	GO:0003006	P	developmental process involved in reproduction	171	1027	4641	39469	3.1e-06	5.4e-05
grey60	GO:0048869	P	cellular developmental process	217	1027	6225	39469	4.8e-06	7.8e-05
grey60	GO:0030154	P	cell differentiation	171	1027	4695	39469	6e-06	9.4e-05
grey60	GO:0022414	P	reproductive process	200	1027	5718	39469	1e-05	0.00015
grey60	GO:0032502	P	developmental process	549	1027	18442	39469	1.2e-05	0.00017
grey60	GO:0043412	P	macromolecule modification	271	1027	8223	39469	1.5e-05	0.00021
grey60	GO:0019748	P	secondary metabolic process	90	1027	2187	39469	2.3e-05	0.00031
grey60	GO:0019222	P	regulation of metabolic process	360	1027	11538	39469	4e-05	0.00051
grey60	GO:0009653	P	anatomical structure morphogenesis	214	1027	6345	39469	4.4e-05	0.00055
grey60	GO:0040007	P	growth	114	1027	3050	39469	9.7e-05	0.0012
grey60	GO:0009908	P	flower development	76	1027	1940	39469	0.00041	0.0048
grey60	GO:0009791	P	post-embryonic development	156	1027	4609	39469	0.0005	0.0057
grey60	GO:0048608	P	reproductive structure development	126	1027	3593	39469	0.00052	0.0057
grey60	GO:0065008	P	regulation of biological quality	147	1027	4443	39469	0.0018	0.019
grey60	GO:0008361	P	regulation of cell size	19	1027	333	39469	0.0018	0.019
grey60	GO:0006810	P	transport	284	1027	9460	39469	0.004	0.04
grey60	GO:0044267	P	cellular protein metabolic process	309	1027	10395	39469	0.0043	0.042
grey60	GO:0009991	P	response to extracellular stimulus	53	1027	1386	39469	0.0047	0.044
grey60	GO:0090066	P	regulation of anatomical structure size	27	1027	590	39469	0.0048	0.044
grey60	GO:0005975	P	carbohydrate metabolic process	123	1027	3739	39469	0.0051	0.046
grey60	GO:0032535	P	regulation of cellular component size	26	1027	567	39469	0.0054	0.048
grey60	GO:0003700	F	transcription factor activity, sequence-specific DNA binding	77	1027	1435	39469	7.2e-09	7.9e-07
grey60	GO:0016301	F	kinase activity	132	1027	3498	39469	1.7e-05	0.00062
grey60	GO:0003824	F	catalytic activity	851	1027	30590	39469	1.7e-05	0.00062
grey60	GO:0016740	F	transferase activity	428	1027	14227	39469	0.00014	0.0037
grey60	GO:0016772	F	transferase activity, transferring phosphorus-containing groups	171	1027	5072	39469	0.00031	0.0069
grey60	GO:0003677	F	DNA binding	144	1027	4276	39469	0.001	0.019
grey60	GO:0012505	C	endomembrane system	453	1027	11356	39469	5.7e-25	1.2e-22
grey60	GO:0043231	C	intracellular membrane-bounded organelle	845	1027	28373	39469	1.2e-14	1.3e-12
grey60	GO:0043227	C	membrane-bounded organelle	847	1027	28520	39469	2.6e-14	1.9e-12
grey60	GO:0043229	C	intracellular organelle	861	1027	29451	39469	1.3e-12	5.5e-11
grey60	GO:0044464	C	cell part	944	1027	33355	39469	1.5e-12	5.5e-11
grey60	GO:0005623	C	cell	944	1027	33355	39469	1.5e-12	5.5e-11
grey60	GO:0005622	C	intracellular	915	1027	31989	39469	2.7e-12	7.9e-11
grey60	GO:0043226	C	organelle	863	1027	29603	39469	2.9e-12	7.9e-11
grey60	GO:0044424	C	intracellular part	907	1027	31794	39469	2.9e-11	7.1e-10
grey60	GO:0005737	C	cytoplasm	854	1027	29454	39469	5.9e-11	1.3e-09
grey60	GO:0005634	C	nucleus	621	1027	19880	39469	8.6e-11	1.7e-09
grey60	GO:0016020	C	membrane	628	1027	20299	39469	3.8e-10	7e-09
grey60	GO:0005783	C	endoplasmic reticulum	199	1027	5027	39469	2.1e-09	3.5e-08
grey60	GO:0005794	C	Golgi apparatus	153	1027	3840	39469	1.6e-07	2.5e-06
grey60	GO:0005886	C	plasma membrane	297	1027	9068	39469	7.9e-06	0.00012
grey60	GO:0044444	C	cytoplasmic part	624	1027	21511	39469	3.7e-05	0.00051
grey60	GO:0005856	C	cytoskeleton	156	1027	4642	39469	0.00068	0.0088
grey60	GO:0009536	C	plastid	332	1027	11216	39469	0.0037	0.045
lightpink2	GO:0009991	P	response to extracellular stimulus	9	41	1386	39469	1e-05	0.0024
lightpink2	GO:0009605	P	response to external stimulus	15	41	5210	39469	0.00014	0.016
magenta	GO:0044238	P	primary metabolic process	729	876	29899	39469	7e-08	1.3e-05
magenta	GO:0009628	P	response to abiotic stimulus	191	876	5910	39469	6.8e-08	1.3e-05
magenta	GO:0009056	P	catabolic process	177	876	5550	39469	5.6e-07	6.8e-05
magenta	GO:0044249	P	cellular biosynthetic process	454	876	17273	39469	1.3e-06	0.00012
magenta	GO:0065008	P	regulation of biological quality	144	876	4443	39469	3.6e-06	0.00026
magenta	GO:0016043	P	cellular component organization	355	876	13119	39469	4.9e-06	0.00029
magenta	GO:0009058	P	biosynthetic process	489	876	19197	39469	1.5e-05	0.00077
magenta	GO:0009605	P	response to external stimulus	160	876	5210	39469	1.8e-05	0.0008
magenta	GO:0006950	P	response to stress	309	876	11399	39469	3e-05	0.0012
magenta	GO:0007267	P	cell-cell signaling	28	876	538	39469	5.8e-05	0.0019
magenta	GO:0009607	P	response to biotic stimulus	122	876	3846	39469	5.6e-05	0.0019
magenta	GO:0044267	P	cellular protein metabolic process	281	876	10395	39469	0.00011	0.0032
magenta	GO:0006807	P	nitrogen compound metabolic process	509	876	20488	39469	0.00016	0.0037
magenta	GO:0040007	P	growth	99	876	3050	39469	0.00014	0.0037
magenta	GO:0003006	P	developmental process involved in reproduction	140	876	4641	39469	0.00014	0.0037
magenta	GO:0051704	P	multi-organism process	172	876	5934	39469	0.00016	0.0037
magenta	GO:0006810	P	transport	257	876	9460	39469	0.00018	0.0039
magenta	GO:0006091	P	generation of precursor metabolites and energy	42	876	1051	39469	0.00031	0.0059
magenta	GO:0005975	P	carbohydrate metabolic process	115	876	3739	39469	0.0003	0.0059
magenta	GO:0019725	P	cellular homeostasis	39	876	965	39469	0.00041	0.0073
magenta	GO:0042592	P	homeostatic process	60	876	1707	39469	0.00048	0.0083
magenta	GO:0019538	P	protein metabolic process	302	876	11559	39469	0.00057	0.0094
magenta	GO:0000003	P	reproduction	171	876	6076	39469	0.00069	0.011
magenta	GO:0007275	P	multicellular organism development	387	876	15387	39469	0.0011	0.017
magenta	GO:0022414	P	reproductive process	160	876	5718	39469	0.0013	0.019
magenta	GO:0051234	P	establishment of localization	265	876	10171	39469	0.0018	0.025
magenta	GO:0009790	P	embryo development	68	876	2117	39469	0.002	0.027
magenta	GO:0030154	P	cell differentiation	133	876	4695	39469	0.0023	0.03
magenta	GO:0006464	P	cellular protein modification process	193	876	7223	39469	0.0032	0.04
magenta	GO:0044237	P	cellular metabolic process	807	876	35246	39469	0.0033	0.04
magenta	GO:0048608	P	reproductive structure development	104	876	3593	39469	0.0039	0.045
magenta	GO:0051179	P	localization	309	876	12243	39469	0.0043	0.048
magenta	GO:0003824	F	catalytic activity	753	876	30590	39469	2.7e-10	3.1e-08
magenta	GO:0043229	C	intracellular organelle	786	876	29451	39469	5.5e-29	1e-26
magenta	GO:0043226	C	organelle	788	876	29603	39469	9e-29	1e-26
magenta	GO:0044444	C	cytoplasmic part	635	876	21511	39469	1.9e-27	1.5e-25
magenta	GO:0043231	C	intracellular membrane-bounded organelle	764	876	28373	39469	3.1e-27	1.8e-25
magenta	GO:0043227	C	membrane-bounded organelle	766	876	28520	39469	5.1e-27	2.3e-25
magenta	GO:0005737	C	cytoplasm	780	876	29454	39469	2.9e-26	1.1e-24
magenta	GO:0044422	C	organelle part	581	876	19127	39469	4.1e-26	1.3e-24
magenta	GO:0005622	C	intracellular	819	876	31989	39469	9.2e-26	2.7e-24
magenta	GO:0044464	C	cell part	838	876	33355	39469	1.7e-25	3.9e-24
magenta	GO:0005623	C	cell	838	876	33355	39469	1.7e-25	3.9e-24
magenta	GO:0044424	C	intracellular part	815	876	31794	39469	3.3e-25	6.8e-24
magenta	GO:0044446	C	intracellular organelle part	537	876	17383	39469	2.7e-24	5.1e-23
magenta	GO:0005829	C	cytosol	189	876	4267	39469	8.4e-20	1.5e-18
magenta	GO:0009536	C	plastid	351	876	11216	39469	1.7e-13	2.8e-12
magenta	GO:0005739	C	mitochondrion	254	876	7913	39469	2.8e-10	4.3e-09
magenta	GO:0016020	C	membrane	538	876	20299	39469	2.5e-09	3.6e-08
magenta	GO:0031967	C	organelle envelope	145	876	4076	39469	1.7e-08	2.4e-07
magenta	GO:0005886	C	plasma membrane	272	876	9068	39469	3.6e-08	4.6e-07
magenta	GO:0032991	C	macromolecular complex	303	876	10399	39469	6.3e-08	7.6e-07
magenta	GO:0005773	C	vacuole	161	876	4772	39469	7.3e-08	8.4e-07
magenta	GO:0031975	C	envelope	155	876	4553	39469	7.9e-08	8.7e-07
magenta	GO:0070013	C	intracellular organelle lumen	232	876	7566	39469	1.1e-07	1.2e-06
magenta	GO:0005783	C	endoplasmic reticulum	166	876	5027	39469	1.7e-07	1.7e-06
magenta	GO:0043233	C	organelle lumen	234	876	7714	39469	2.3e-07	2.2e-06
magenta	GO:0031974	C	membrane-enclosed lumen	234	876	7724	39469	2.5e-07	2.3e-06
magenta	GO:0012505	C	endomembrane system	321	876	11356	39469	4e-07	3.5e-06
magenta	GO:0005634	C	nucleus	515	876	19880	39469	4.6e-07	3.9e-06
magenta	GO:0030529	C	intracellular ribonucleoprotein complex	119	876	3463	39469	2.2e-06	1.8e-05
magenta	GO:0005794	C	Golgi apparatus	125	876	3840	39469	1.5e-05	0.00012
magenta	GO:0005730	C	nucleolus	76	876	2058	39469	1.8e-05	0.00014
magenta	GO:0031981	C	nuclear lumen	192	876	6973	39469	0.00086	0.0064
magenta	GO:0044428	C	nuclear part	212	876	7833	39469	0.001	0.0074
magenta	GO:0005654	C	nucleoplasm	144	876	5067	39469	0.0013	0.0094
magenta	GO:0043232	C	intracellular non-membrane-bounded organelle	273	876	10561	39469	0.0023	0.016
magenta	GO:0043228	C	non-membrane-bounded organelle	273	876	10591	39469	0.0027	0.018
magenta	GO:0005576	C	extracellular region	89	876	2963	39469	0.0029	0.018
magenta	GO:0005777	C	peroxisome	20	876	464	39469	0.0051	0.031
magenta	GO:0042579	C	microbody	20	876	464	39469	0.0051	0.031
magenta4	GO:0050896	P	response to stimulus	301	426	21792	39469	5.6e-11	1.8e-08
magenta4	GO:0009056	P	catabolic process	100	426	5550	39469	1.7e-07	2.8e-05
magenta4	GO:0009628	P	response to abiotic stimulus	101	426	5910	39469	1.6e-06	0.00018
magenta4	GO:0006950	P	response to stress	167	426	11399	39469	3.5e-06	0.00029
magenta4	GO:0009719	P	response to endogenous stimulus	87	426	5149	39469	1.6e-05	0.00097
magenta4	GO:0019748	P	secondary metabolic process	46	426	2187	39469	1.8e-05	0.00097
magenta4	GO:0009991	P	response to extracellular stimulus	32	426	1386	39469	6.8e-05	0.0027
magenta4	GO:0065008	P	regulation of biological quality	75	426	4443	39469	7.4e-05	0.0027
magenta4	GO:0009605	P	response to external stimulus	85	426	5210	39469	7.2e-05	0.0027
magenta4	GO:0007154	P	cell communication	130	426	8894	39469	9.4e-05	0.0031
magenta4	GO:0006810	P	transport	136	426	9460	39469	0.00013	0.0039
magenta4	GO:0065007	P	biological regulation	281	426	22769	39469	0.00031	0.0086
magenta4	GO:0006629	P	lipid metabolic process	65	426	3959	39469	0.0005	0.012
magenta4	GO:0051234	P	establishment of localization	141	426	10171	39469	0.00048	0.012
magenta4	GO:0051179	P	localization	163	426	12243	39469	0.00094	0.021
magenta4	GO:0007165	P	signal transduction	108	426	7659	39469	0.0017	0.035
magenta4	GO:0003824	F	catalytic activity	375	426	30590	39469	2.2e-08	2.1e-06
magenta4	GO:0005737	C	cytoplasm	391	426	29454	39469	1.3e-19	3e-17
magenta4	GO:0043231	C	intracellular membrane-bounded organelle	382	426	28373	39469	3.7e-19	4.1e-17
magenta4	GO:0043227	C	membrane-bounded organelle	382	426	28520	39469	1.5e-18	1.1e-16
magenta4	GO:0044424	C	intracellular part	403	426	31794	39469	6.9e-17	3.8e-15
magenta4	GO:0005622	C	intracellular	403	426	31989	39469	4.5e-16	2e-14
magenta4	GO:0043229	C	intracellular organelle	383	426	29451	39469	2.1e-15	7.6e-14
magenta4	GO:0043226	C	organelle	383	426	29603	39469	7.7e-15	2.4e-13
magenta4	GO:0044464	C	cell part	408	426	33355	39469	1.5e-13	3.7e-12
magenta4	GO:0005623	C	cell	408	426	33355	39469	1.5e-13	3.7e-12
magenta4	GO:0044444	C	cytoplasmic part	306	426	21511	39469	2.1e-13	4.6e-12
magenta4	GO:0005829	C	cytosol	89	426	4267	39469	1.4e-09	2.7e-08
magenta4	GO:0012505	C	endomembrane system	180	426	11356	39469	2.5e-09	4.6e-08
magenta4	GO:0005777	C	peroxisome	23	426	464	39469	4e-09	6.3e-08
magenta4	GO:0042579	C	microbody	23	426	464	39469	4e-09	6.3e-08
magenta4	GO:0005773	C	vacuole	90	426	4772	39469	1.2e-07	1.7e-06
magenta4	GO:0005739	C	mitochondrion	126	426	7913	39469	2.1e-06	2.9e-05
magenta4	GO:0044422	C	organelle part	254	426	19127	39469	2.7e-06	3.5e-05
magenta4	GO:0005634	C	nucleus	260	426	19880	39469	6.9e-06	8.4e-05
magenta4	GO:0016020	C	membrane	263	426	20299	39469	1.3e-05	0.00015
magenta4	GO:0009536	C	plastid	161	426	11216	39469	2e-05	0.00022
magenta4	GO:0005783	C	endoplasmic reticulum	84	426	5027	39469	3.5e-05	0.00037
magenta4	GO:0044446	C	intracellular organelle part	222	426	17383	39469	0.00053	0.0053
magenta4	GO:0031967	C	organelle envelope	66	426	4076	39469	0.00065	0.0062
magenta4	GO:0031975	C	envelope	71	426	4553	39469	0.0011	0.0099
magenta4	GO:0005768	C	endosome	36	426	1929	39469	0.0013	0.011
magenta4	GO:0005886	C	plasma membrane	122	426	9068	39469	0.0041	0.034
mediumpurple4	GO:0019748	P	secondary metabolic process	44	368	2187	39469	2e-06	0.00067
mediumpurple4	GO:0009628	P	response to abiotic stimulus	86	368	5910	39469	1.6e-05	0.0026
mediumpurple4	GO:0009719	P	response to endogenous stimulus	76	368	5149	39469	3.6e-05	0.004
mediumpurple4	GO:0032502	P	developmental process	209	368	18442	39469	7.3e-05	0.0061
mediumpurple4	GO:0003824	F	catalytic activity	317	368	30590	39469	2.1e-05	0.002
mediumpurple4	GO:0016740	F	transferase activity	162	368	14227	39469	0.001	0.049
mediumpurple4	GO:0043227	C	membrane-bounded organelle	318	368	28520	39469	7.5e-11	1.7e-08
mediumpurple4	GO:0043231	C	intracellular membrane-bounded organelle	315	368	28373	39469	3.9e-10	3.1e-08
mediumpurple4	GO:0043226	C	organelle	324	368	29603	39469	4.3e-10	3.1e-08
mediumpurple4	GO:0005737	C	cytoplasm	322	368	29454	39469	9.6e-10	5.3e-08
mediumpurple4	GO:0043229	C	intracellular organelle	321	368	29451	39469	2.2e-09	7e-08
mediumpurple4	GO:0044464	C	cell part	348	368	33355	39469	1.9e-09	7e-08
mediumpurple4	GO:0005623	C	cell	348	368	33355	39469	1.9e-09	7e-08
mediumpurple4	GO:0044424	C	intracellular part	336	368	31794	39469	1.1e-08	2.7e-07
mediumpurple4	GO:0044444	C	cytoplasmic part	254	368	21511	39469	1e-08	2.7e-07
mediumpurple4	GO:0031975	C	envelope	80	368	4553	39469	2.3e-08	5e-07
mediumpurple4	GO:0005622	C	intracellular	336	368	31989	39469	3.8e-08	7.6e-07
mediumpurple4	GO:0012505	C	endomembrane system	154	368	11356	39469	6.8e-08	1.2e-06
mediumpurple4	GO:0031967	C	organelle envelope	70	368	4076	39469	5e-07	8e-06
mediumpurple4	GO:0009536	C	plastid	149	368	11216	39469	5.1e-07	8e-06
mediumpurple4	GO:0044422	C	organelle part	224	368	19127	39469	1.3e-06	1.9e-05
mediumpurple4	GO:0005739	C	mitochondrion	112	368	7913	39469	1.7e-06	2.3e-05
mediumpurple4	GO:0016020	C	membrane	229	368	20299	39469	2.1e-05	0.00027
mediumpurple4	GO:0005783	C	endoplasmic reticulum	74	368	5027	39469	5.1e-05	0.00062
mediumpurple4	GO:0044446	C	intracellular organelle part	194	368	17383	39469	0.00054	0.0062
mediumpurple4	GO:0005634	C	nucleus	217	368	19880	39469	0.0006	0.0066
mediumpurple4	GO:0005829	C	cytosol	59	368	4267	39469	0.0015	0.016
mediumpurple4	GO:0005794	C	Golgi apparatus	53	368	3840	39469	0.0028	0.028
mediumpurple4	GO:0005773	C	vacuole	63	368	4772	39469	0.0031	0.029
mediumpurple4	GO:0005764	C	lysosome	9	368	335	39469	0.005	0.046
palevioletred2	GO:0050896	P	response to stimulus	356	524	21792	39469	2.3e-09	8.2e-07
palevioletred2	GO:0006950	P	response to stress	206	524	11399	39469	2.3e-07	2.8e-05
palevioletred2	GO:0009605	P	response to external stimulus	112	524	5210	39469	2.1e-07	2.8e-05
palevioletred2	GO:0008219	P	cell death	59	524	2283	39469	1.3e-06	0.00012
palevioletred2	GO:0009628	P	response to abiotic stimulus	119	524	5910	39469	2.1e-06	0.00015
palevioletred2	GO:0065007	P	biological regulation	352	524	22769	39469	6e-06	0.00036
palevioletred2	GO:0009607	P	response to biotic stimulus	82	524	3846	39469	1.7e-05	0.00085
palevioletred2	GO:0050794	P	regulation of cellular process	283	524	18086	39469	0.00012	0.0051
palevioletred2	GO:0009719	P	response to endogenous stimulus	96	524	5149	39469	0.00042	0.015
palevioletred2	GO:0051704	P	multi-organism process	108	524	5934	39469	0.00041	0.015
palevioletred2	GO:0006810	P	transport	157	524	9460	39469	0.0011	0.035
palevioletred2	GO:0003824	F	catalytic activity	447	524	30590	39469	5.6e-06	0.00064
palevioletred2	GO:0043226	C	organelle	465	524	29603	39469	3.7e-15	8.3e-13
palevioletred2	GO:0043227	C	membrane-bounded organelle	453	524	28520	39469	7.9e-15	8.9e-13
palevioletred2	GO:0043229	C	intracellular organelle	462	524	29451	39469	1.5e-14	1.1e-12
palevioletred2	GO:0043231	C	intracellular membrane-bounded organelle	450	524	28373	39469	2.8e-14	1.6e-12
palevioletred2	GO:0005737	C	cytoplasm	461	524	29454	39469	3.7e-14	1.7e-12
palevioletred2	GO:0044424	C	intracellular part	480	524	31794	39469	2.4e-12	8.8e-11
palevioletred2	GO:0005622	C	intracellular	481	524	31989	39469	5.5e-12	1.8e-10
palevioletred2	GO:0044464	C	cell part	492	524	33355	39469	3.9e-11	9.6e-10
palevioletred2	GO:0005623	C	cell	492	524	33355	39469	3.9e-11	9.6e-10
palevioletred2	GO:0044422	C	organelle part	322	524	19127	39469	2e-09	4.5e-08
palevioletred2	GO:0044444	C	cytoplasmic part	351	524	21511	39469	5e-09	1e-07
palevioletred2	GO:0012505	C	endomembrane system	210	524	11356	39469	2.4e-08	4.5e-07
palevioletred2	GO:0005634	C	nucleus	321	524	19880	39469	4.1e-07	7.1e-06
palevioletred2	GO:0005886	C	plasma membrane	169	524	9068	39469	9e-07	1.4e-05
palevioletred2	GO:0044446	C	intracellular organelle part	283	524	17383	39469	3.4e-06	5.1e-05
palevioletred2	GO:0016020	C	membrane	318	524	20299	39469	1.4e-05	0.0002
palevioletred2	GO:0005829	C	cytosol	87	524	4267	39469	4.4e-05	0.00059
palevioletred2	GO:0009536	C	plastid	189	524	11216	39469	9.7e-05	0.0012
palevioletred2	GO:0005773	C	vacuole	93	524	4772	39469	0.00012	0.0014
palevioletred2	GO:0005768	C	endosome	43	524	1929	39469	0.00084	0.0095
palevioletred2	GO:0005794	C	Golgi apparatus	73	524	3840	39469	0.0014	0.015
palevioletred2	GO:0031974	C	membrane-enclosed lumen	128	524	7724	39469	0.0039	0.04
palevioletred2	GO:0044428	C	nuclear part	129	524	7833	39469	0.0046	0.045
palevioletred2	GO:0043233	C	organelle lumen	127	524	7714	39469	0.005	0.047
purple	GO:0009719	P	response to endogenous stimulus	118	390	5149	39469	9.7e-19	3.3e-16
purple	GO:0050896	P	response to stimulus	289	390	21792	39469	1.3e-14	2.3e-12
purple	GO:0006950	P	response to stress	175	390	11399	39469	2e-11	2.3e-09
purple	GO:0007165	P	signal transduction	128	390	7659	39469	3.3e-10	2.9e-08
purple	GO:0007154	P	cell communication	142	390	8894	39469	4.9e-10	3.3e-08
purple	GO:0009628	P	response to abiotic stimulus	101	390	5910	39469	1.9e-08	1.1e-06
purple	GO:0051704	P	multi-organism process	100	390	5934	39469	4.5e-08	1.9e-06
purple	GO:0009605	P	response to external stimulus	91	390	5210	39469	4.5e-08	1.9e-06
purple	GO:0050794	P	regulation of cellular process	230	390	18086	39469	1.5e-07	5.6e-06
purple	GO:0009607	P	response to biotic stimulus	69	390	3846	39469	1.1e-06	3.9e-05
purple	GO:0050789	P	regulation of biological process	252	390	21285	39469	1.3e-05	0.00042
purple	GO:0008219	P	cell death	44	390	2283	39469	2.5e-05	0.00071
purple	GO:0048856	P	anatomical structure development	203	390	16536	39469	3.7e-05	0.00097
purple	GO:0007275	P	multicellular organism development	191	390	15387	39469	4.3e-05	0.001
purple	GO:0065007	P	biological regulation	260	390	22769	39469	0.00019	0.0042
purple	GO:0019222	P	regulation of metabolic process	147	390	11538	39469	0.00022	0.0046
purple	GO:0032501	P	multicellular organismal process	212	390	17974	39469	0.00031	0.0063
purple	GO:0009856	P	pollination	23	390	1054	39469	0.00045	0.0087
purple	GO:0030154	P	cell differentiation	69	390	4695	39469	0.00056	0.01
purple	GO:0016049	P	cell growth	37	390	2097	39469	0.00059	0.01
purple	GO:0032502	P	developmental process	213	390	18442	39469	0.0011	0.019
purple	GO:0010468	P	regulation of gene expression	95	390	7141	39469	0.0012	0.019
purple	GO:0019748	P	secondary metabolic process	37	390	2187	39469	0.0012	0.019
purple	GO:0051234	P	establishment of localization	125	390	10171	39469	0.0034	0.048
purple	GO:0003700	F	transcription factor activity, sequence-specific DNA binding	49	390	1435	39469	1.3e-13	1.2e-11
purple	GO:0003677	F	DNA binding	87	390	4276	39469	7.4e-11	3.4e-09
purple	GO:0003676	F	nucleic acid binding	104	390	7956	39469	0.0012	0.037
purple	GO:0012505	C	endomembrane system	171	390	11356	39469	2.2e-10	4.5e-08
purple	GO:0044464	C	cell part	365	390	33355	39469	3.7e-08	2.5e-06
purple	GO:0005623	C	cell	365	390	33355	39469	3.7e-08	2.5e-06
purple	GO:0016020	C	membrane	251	390	20299	39469	2e-07	1e-05
purple	GO:0043231	C	intracellular membrane-bounded organelle	323	390	28373	39469	3.7e-07	1.5e-05
purple	GO:0005634	C	nucleus	245	390	19880	39469	5.6e-07	1.9e-05
purple	GO:0043227	C	membrane-bounded organelle	323	390	28520	39469	8.1e-07	2.4e-05
purple	GO:0043229	C	intracellular organelle	327	390	29451	39469	8.5e-06	0.00022
purple	GO:0043226	C	organelle	328	390	29603	39469	1e-05	0.00023
purple	GO:0005773	C	vacuole	76	390	4772	39469	2.1e-05	0.00043
purple	GO:0044424	C	intracellular part	344	390	31794	39469	3.9e-05	0.00073
purple	GO:0005622	C	intracellular	345	390	31989	39469	5.7e-05	0.00096
purple	GO:0005783	C	endoplasmic reticulum	77	390	5027	39469	6.8e-05	0.0011
purple	GO:0005737	C	cytoplasm	320	390	29454	39469	0.00033	0.0047
purple	GO:0005768	C	endosome	34	390	1929	39469	0.001	0.014
purple	GO:0005886	C	plasma membrane	116	390	9068	39469	0.0013	0.016
purple	GO:0005730	C	nucleolus	34	390	2058	39469	0.0028	0.034
yellowgreen	GO:0009056	P	catabolic process	51	182	5550	39469	7.7e-07	0.00023
yellowgreen	GO:0009628	P	response to abiotic stimulus	50	182	5910	39469	1.1e-05	0.0011
yellowgreen	GO:0006950	P	response to stress	80	182	11399	39469	1.1e-05	0.0011
yellowgreen	GO:0050896	P	response to stimulus	127	182	21792	39469	4.2e-05	0.0031
yellowgreen	GO:0009719	P	response to endogenous stimulus	42	182	5149	39469	0.00016	0.0091
yellowgreen	GO:0019748	P	secondary metabolic process	23	182	2187	39469	0.00021	0.01
yellowgreen	GO:0009991	P	response to extracellular stimulus	17	182	1386	39469	0.00027	0.011
yellowgreen	GO:0016788	F	hydrolase activity, acting on ester bonds	21	182	2118	39469	0.00087	0.043
yellowgreen	GO:0031012	C	extracellular matrix	7	182	240	39469	0.00015	0.031
yellowgreen	GO:0044421	C	extracellular region part	12	182	800	39469	0.0004	0.041
