# Supplementary material for: Transcriptomic Analysis Reveals Candidate Genes Responding Maize Gray Leaf Spot Caused by Cercospora zeina
Source: Plants (Basel). 2021 Oct 22;10(11):2257. doi: 10.3390/plants10112257 (PMC8625984; doi:10.3390/plants10112257)
Supplement: Supplementary file 1 [file plants-10-02257-s001.zip › Table S5.xlsx]

## Sheet: Sheet1
Module	Term	Database	ID	Input number	Background number	P-Value	Corrected P-Value
antiquewhite2	Ribosome	KEGG PATHWAY	zma03010	18	479	1.33824e-09	6.15591e-08
antiquewhite2	Photosynthesis - antenna proteins	KEGG PATHWAY	zma00196	4	29	4.24205e-05	0.000975672
antiquewhite2	Aminoacyl-tRNA biosynthesis	KEGG PATHWAY	zma00970	5	108	0.000576103	0.00883359
antiquewhite2	Porphyrin and chlorophyll metabolism	KEGG PATHWAY	zma00860	4	69	0.000937944	0.0107864
antiquewhite2	Photosynthesis	KEGG PATHWAY	zma00195	4	98	0.00320565	0.029492
bisque4	Ribosome	KEGG PATHWAY	zma03010	50	479	8.43e-31	5.74e-29
Black	Metabolic pathways	KEGG PATHWAY	zma01100	183	2943	3.66576e-12	4.3256e-10
Black	Glycerolipid metabolism	KEGG PATHWAY	zma00561	17	106	1.38252e-06	8.15685e-05
Black	Peroxisome	KEGG PATHWAY	zma04146	17	110	2.171e-06	8.53926e-05
Black	Endocytosis	KEGG PATHWAY	zma04144	24	246	3.04883e-05	0.000899404
Black	MAPK signaling pathway - plant	KEGG PATHWAY	zma04016	20	204	0.000127067	0.00290831
Black	SNARE interactions in vesicular transport	KEGG PATHWAY	zma04130	9	48	0.00014788	0.00290831
Black	Autophagy - other	KEGG PATHWAY	zma04136	10	62	0.000193358	0.00325946
Black	Biosynthesis of secondary metabolites	KEGG PATHWAY	zma01110	79	1499	0.000921401	0.0135907
Black	Pyruvate metabolism	KEGG PATHWAY	zma00620	12	118	0.00202985	0.0266135
Black	Glycerophospholipid metabolism	KEGG PATHWAY	zma00564	13	142	0.00315492	0.0362306
Black	Protein processing in endoplasmic reticulum	KEGG PATHWAY	zma04141	21	291	0.00337743	0.0362306
Black	Amino sugar and nucleotide sugar metabolism	KEGG PATHWAY	zma00520	15	185	0.00461	0.0453316
blue	Metabolic pathways	KEGG PATHWAY	zma01100	113	2943	3.72851e-05	0.0037658
blue	Biosynthesis of amino acids	KEGG PATHWAY	zma01230	22	342	0.000179173	0.00904823
blue	Other glycan degradation	KEGG PATHWAY	zma00511	5	21	0.000435618	0.0146658
blue	Biosynthesis of secondary metabolites	KEGG PATHWAY	zma01110	59	1499	0.00158286	0.0399672
brown2	Protein processing in endoplasmic reticulum	KEGG PATHWAY	zma04141	10	291	1.97479e-05	0.000994495
brown2	Proteasome	KEGG PATHWAY	zma03050	6	94	3.75281e-05	0.000994495
brown2	mRNA surveillance pathway	KEGG PATHWAY	zma03015	7	177	0.000153742	0.00271611
brown2	Protein export	KEGG PATHWAY	zma03060	4	70	0.00114632	0.0130716
brown2	Amino sugar and nucleotide sugar metabolism	KEGG PATHWAY	zma00520	6	185	0.00123317	0.0130716
brown4	Metabolic pathways	KEGG PATHWAY	zma01100	95	2943	1.95098e-12	1.7949e-10
brown4	Biosynthesis of secondary metabolites	KEGG PATHWAY	zma01110	51	1499	8.0126e-08	3.6858e-06
brown4	Carbon metabolism	KEGG PATHWAY	zma01200	18	353	1.10365e-05	0.000338454
brown4	Glyoxylate and dicarboxylate metabolism	KEGG PATHWAY	zma00630	9	101	3.54526e-05	0.000815409
brown4	Alanine, aspartate and glutamate metabolism	KEGG PATHWAY	zma00250	7	75	0.000200547	0.00313814
brown4	Glycine, serine and threonine metabolism	KEGG PATHWAY	zma00260	8	101	0.000204662	0.00313814
brown4	Biosynthesis of amino acids	KEGG PATHWAY	zma01230	14	342	0.000845185	0.0111081
brown4	Carbon fixation in photosynthetic organisms	KEGG PATHWAY	zma00710	7	104	0.00124785	0.0133962
brown4	Photosynthesis - antenna proteins	KEGG PATHWAY	zma00196	4	29	0.00131049	0.0133962
brown4	Purine metabolism	KEGG PATHWAY	zma00230	8	141	0.00161768	0.0148826
brown4	Ubiquinone and other terpenoid-quinone biosynthesis	KEGG PATHWAY	zma00130	5	58	0.00227453	0.0190234
brown4	Nicotinate and nicotinamide metabolism	KEGG PATHWAY	zma00760	3	22	0.0055907	0.042862
brown4	Pentose phosphate pathway	KEGG PATHWAY	zma00030	5	76	0.00669951	0.0474119
coral	Amino sugar and nucleotide sugar metabolism	KEGG PATHWAY	zma00520	10	185	6.9924e-05	0.00489468
coral	Metabolic pathways	KEGG PATHWAY	zma01100	55	2943	0.000170302	0.00596055
coral1	Spliceosome	KEGG PATHWAY	zma03040	8	276	0.000351875	0.0161863
darkmagenta	Metabolic pathways	KEGG PATHWAY	zma01100	56	2943	0.00051824	0.0422488
darkmagenta	MAPK signaling pathway - plant	KEGG PATHWAY	zma04016	9	204	0.00105744	0.0422488
darkmagenta	Arginine and proline metabolism	KEGG PATHWAY	zma00330	5	67	0.00165427	0.0422488
darkmagenta	Glycerophospholipid metabolism	KEGG PATHWAY	zma00564	7	142	0.00206092	0.0422488
darkolivegreen	Spliceosome	KEGG PATHWAY	zma03040	13	276	2.42481e-06	0.000138214
darkolivegreen	Protein processing in endoplasmic reticulum	KEGG PATHWAY	zma04141	11	291	9.73532e-05	0.00277457
darkolivegreen	Inositol phosphate metabolism	KEGG PATHWAY	zma00562	6	91	0.00024146	0.00458775
darkolivegreen	Starch and sucrose metabolism	KEGG PATHWAY	zma00500	8	192	0.000464728	0.00662237
darkolivegreen	Glycerophospholipid metabolism	KEGG PATHWAY	zma00564	6	142	0.00220439	0.0251301
darkolivegreen	Autophagy - other	KEGG PATHWAY	zma04136	4	62	0.0029024	0.0275728
darkolivegreen4	Phenylalanine, tyrosine and tryptophan biosynthesis	KEGG PATHWAY	zma00400	3	72	0.000602574	0.0156669
darkolivegreen4	Plant-pathogen interaction	KEGG PATHWAY	zma04626	4	209	0.00124238	0.016151
darkslateblue	Ribosome	KEGG PATHWAY	zma03010	13	479	4.33195e-05	0.00259917
darkslateblue	Cysteine and methionine metabolism	KEGG PATHWAY	zma00270	6	141	0.00056671	0.0170013
darkslateblue	Phenylalanine metabolism	KEGG PATHWAY	zma00360	3	36	0.00245281	0.0471897
darkslateblue	Spliceosome	KEGG PATHWAY	zma03040	7	276	0.00364471	0.0471897
darkslateblue	Tyrosine metabolism	KEGG PATHWAY	zma00350	3	43	0.00393248	0.0471897
darkslateblue	Metabolic pathways	KEGG PATHWAY	zma01100	33	2943	0.0048166	0.048166
darkturquoise	Carbon metabolism	KEGG PATHWAY	zma01200	11	353	9.36482e-07	5.33795e-05
darkturquoise	Proteasome	KEGG PATHWAY	zma03050	6	94	6.46258e-06	0.000184184
darkturquoise	Biosynthesis of secondary metabolites	KEGG PATHWAY	zma01110	20	1499	1.96645e-05	0.000373625
darkturquoise	Metabolic pathways	KEGG PATHWAY	zma01100	29	2943	7.11711e-05	0.000834959
darkturquoise	Citrate cycle (TCA cycle)	KEGG PATHWAY	zma00020	5	90	7.3242e-05	0.000834959
darkturquoise	Biosynthesis of amino acids	KEGG PATHWAY	zma01230	8	342	0.000203354	0.00193187
darkturquoise	Protein processing in endoplasmic reticulum	KEGG PATHWAY	zma04141	7	291	0.000431518	0.00351379
darkturquoise	Ubiquitin mediated proteolysis	KEGG PATHWAY	zma04120	5	169	0.0011911	0.00847158
darkturquoise	Propanoate metabolism	KEGG PATHWAY	zma00640	3	45	0.00133762	0.00847158
darkturquoise	alpha-Linolenic acid metabolism	KEGG PATHWAY	zma00592	3	56	0.00242464	0.0138204
darkturquoise	Protein export	KEGG PATHWAY	zma03060	3	70	0.00443019	0.0229564
darkturquoise	Pentose phosphate pathway	KEGG PATHWAY	zma00030	3	76	0.00552301	0.0262343
darkturquoise	2-Oxocarboxylic acid metabolism	KEGG PATHWAY	zma01210	3	81	0.0065467	0.0287047
darkturquoise	Glyoxylate and dicarboxylate metabolism	KEGG PATHWAY	zma00630	3	101	0.0117207	0.0477198
deeppink	Ribosome	KEGG PATHWAY	zma03010	136	479	7.03425e-109	5.41637e-107
deeppink	Protein export	KEGG PATHWAY	zma03060	12	70	1.84198e-08	7.09162e-07
deeppink	Oxidative phosphorylation	KEGG PATHWAY	zma00190	16	173	2.32677e-07	5.97204e-06
deeppink	Proteasome	KEGG PATHWAY	zma03050	11	94	2.24201e-06	4.31587e-05
deeppink	Spliceosome	KEGG PATHWAY	zma03040	16	276	6.00733e-05	0.000925128
deeppink	Protein processing in endoplasmic reticulum	KEGG PATHWAY	zma04141	16	291	0.000107754	0.00138284
deeppink	Phagosome	KEGG PATHWAY	zma04145	9	138	0.00110968	0.0122065
deeppink	Thiamine metabolism	KEGG PATHWAY	zma00730	4	32	0.00339205	0.0326485
floralwhite	RNA transport	KEGG PATHWAY	zma03013	60	236	2.00383e-31	2.20421e-29
floralwhite	Spliceosome	KEGG PATHWAY	zma03040	39	276	2.11056e-13	1.16081e-11
floralwhite	Ribosome biogenesis in eukaryotes	KEGG PATHWAY	zma03008	26	126	1.31719e-12	4.82971e-11
floralwhite	mRNA surveillance pathway	KEGG PATHWAY	zma03015	23	177	6.87098e-08	1.88952e-06
floralwhite	RNA degradation	KEGG PATHWAY	zma03018	21	175	8.197e-07	1.80334e-05
floralwhite	Aminoacyl-tRNA biosynthesis	KEGG PATHWAY	zma00970	15	108	6.12552e-06	0.000112301
floralwhite	Circadian rhythm - plant	KEGG PATHWAY	zma04712	11	77	8.26309e-05	0.00129848
floralwhite	Metabolic pathways	KEGG PATHWAY	zma01100	130	2943	0.00015415	0.00211956
floralwhite	N-Glycan biosynthesis	KEGG PATHWAY	zma00510	8	51	0.000434482	0.00530936
floralwhite	Biosynthesis of amino acids	KEGG PATHWAY	zma01230	24	342	0.000482669	0.00530936
floralwhite	Purine metabolism	KEGG PATHWAY	zma00230	13	141	0.0010029	0.00964237
floralwhite	Lysine biosynthesis	KEGG PATHWAY	zma00300	5	21	0.00105189	0.00964237
floralwhite	Protein processing in endoplasmic reticulum	KEGG PATHWAY	zma04141	20	291	0.00172192	0.0145701
floralwhite	Alanine, aspartate and glutamate metabolism	KEGG PATHWAY	zma00250	8	75	0.00405113	0.0318303
floralwhite	Ubiquitin mediated proteolysis	KEGG PATHWAY	zma04120	13	169	0.00436999	0.0320466
floralwhite	Carbon metabolism	KEGG PATHWAY	zma01200	21	353	0.00648575	0.0445896
green	Metabolic pathways	KEGG PATHWAY	zma01100	75	2943	6.69386e-05	0.00609141
green	Ribosome	KEGG PATHWAY	zma03010	19	479	0.000415228	0.0188929
green	Cysteine and methionine metabolism	KEGG PATHWAY	zma00270	9	141	0.000653995	0.0198378
greenyellow	Metabolic pathways	KEGG PATHWAY	zma01100	130	2943	1.29577e-20	1.24393e-18
greenyellow	Oxidative phosphorylation	KEGG PATHWAY	zma00190	24	173	1.43877e-13	6.90609e-12
greenyellow	Biosynthesis of secondary metabolites	KEGG PATHWAY	zma01110	62	1499	3.49426e-09	1.11816e-07
greenyellow	Phenylpropanoid biosynthesis	KEGG PATHWAY	zma00940	21	243	1.28271e-08	3.07852e-07
greenyellow	Amino sugar and nucleotide sugar metabolism	KEGG PATHWAY	zma00520	12	185	0.000217141	0.00416911
greenyellow	MAPK signaling pathway - plant	KEGG PATHWAY	zma04016	12	204	0.000500169	0.0080027
greenyellow	Phagosome	KEGG PATHWAY	zma04145	9	138	0.00125106	0.0171575
grey60	Plant-pathogen interaction	KEGG PATHWAY	zma04626	30	209	1.7687e-14	1.27347e-12
grey60	MAPK signaling pathway - plant	KEGG PATHWAY	zma04016	28	204	3.51921e-13	1.26692e-11
grey60	Plant hormone signal transduction	KEGG PATHWAY	zma04075	26	368	8.2429e-07	1.9783e-05
honeydew1	Basal transcription factors	KEGG PATHWAY	zma03022	5	67	0.000237805	0.0149817
indianred4	Starch and sucrose metabolism	KEGG PATHWAY	zma00500	5	192	7.07994e-05	0.0018719
indianred4	Metabolic pathways	KEGG PATHWAY	zma01100	17	2943	0.000183717	0.0018719
indianred4	Carotenoid biosynthesis	KEGG PATHWAY	zma00906	3	48	0.00018719	0.0018719
indianred4	Biosynthesis of secondary metabolites	KEGG PATHWAY	zma01110	9	1499	0.00528825	0.0396619
lavenderblush2	Ubiquitin mediated proteolysis	KEGG PATHWAY	zma04120	5	169	2.31324e-05	0.000971561
lavenderblush2	Biosynthesis of amino acids	KEGG PATHWAY	zma01230	6	342	6.04815e-05	0.00127011
lavenderblush2	2-Oxocarboxylic acid metabolism	KEGG PATHWAY	zma01210	3	81	0.000591062	0.00827487
lavenderblush2	Arginine biosynthesis	KEGG PATHWAY	zma00220	2	43	0.00345484	0.0362758
lavenderblush2	RNA degradation	KEGG PATHWAY	zma03018	3	175	0.00503325	0.0422793
lightcoral	Proteasome	KEGG PATHWAY	zma03050	4	94	7.0517e-05	0.00176293
lightpink2	Glycerolipid metabolism	KEGG PATHWAY	zma00561	3	106	0.000113266	0.00158572
lightsteelblue1	Endocytosis	KEGG PATHWAY	zma04144	6	246	0.000393767	0.0126005
lightsteelblue1	RNA transport	KEGG PATHWAY	zma03013	5	236	0.00220852	0.031278
lightsteelblue1	Spliceosome	KEGG PATHWAY	zma03040	5	276	0.00425138	0.031278
lightsteelblue1	Oxidative phosphorylation	KEGG PATHWAY	zma00190	4	173	0.00452572	0.031278
lightsteelblue1	Protein processing in endoplasmic reticulum	KEGG PATHWAY	zma04141	5	291	0.00528372	0.031278
lightsteelblue1	Proteasome	KEGG PATHWAY	zma03050	3	94	0.00586462	0.031278
magenta	Metabolic pathways	KEGG PATHWAY	zma01100	159	2943	1.59269e-31	1.62454e-29
magenta	Biosynthesis of secondary metabolites	KEGG PATHWAY	zma01110	99	1499	1.88236e-25	9.60006e-24
magenta	Carbon metabolism	KEGG PATHWAY	zma01200	38	353	1.75663e-16	5.97254e-15
magenta	Biosynthesis of amino acids	KEGG PATHWAY	zma01230	36	342	2.06796e-15	5.27329e-14
magenta	Phenylalanine, tyrosine and tryptophan biosynthesis	KEGG PATHWAY	zma00400	12	72	5.55658e-08	1.13354e-06
magenta	Glycolysis / Gluconeogenesis	KEGG PATHWAY	zma00010	17	180	2.16771e-07	3.6851e-06
magenta	Protein processing in endoplasmic reticulum	KEGG PATHWAY	zma04141	20	291	2.12102e-06	3.09062e-05
magenta	Citrate cycle (TCA cycle)	KEGG PATHWAY	zma00020	11	90	3.14925e-06	4.0153e-05
magenta	N-Glycan biosynthesis	KEGG PATHWAY	zma00510	8	51	1.37813e-05	0.000156188
magenta	Ribosome	KEGG PATHWAY	zma03010	22	479	0.000231847	0.00210758
magenta	mRNA surveillance pathway	KEGG PATHWAY	zma03015	12	177	0.000251944	0.00210758
magenta	Ribosome biogenesis in eukaryotes	KEGG PATHWAY	zma03008	10	126	0.000253265	0.00210758
magenta	2-Oxocarboxylic acid metabolism	KEGG PATHWAY	zma01210	8	81	0.000268613	0.00210758
magenta	Glycerophospholipid metabolism	KEGG PATHWAY	zma00564	10	142	0.000612495	0.00430272
magenta	Pyruvate metabolism	KEGG PATHWAY	zma00620	9	118	0.000666289	0.00430272
magenta	Proteasome	KEGG PATHWAY	zma03050	8	94	0.000674936	0.00430272
magenta	Oxidative phosphorylation	KEGG PATHWAY	zma00190	11	173	0.000743601	0.0044616
magenta	Ether lipid metabolism	KEGG PATHWAY	zma00565	5	36	0.000968103	0.00548592
magenta	Glyoxylate and dicarboxylate metabolism	KEGG PATHWAY	zma00630	8	101	0.00104361	0.00560253
magenta	Glutathione metabolism	KEGG PATHWAY	zma00480	9	128	0.00114296	0.00582911
magenta	Spliceosome	KEGG PATHWAY	zma03040	14	276	0.00125418	0.00609172
magenta	Ascorbate and aldarate metabolism	KEGG PATHWAY	zma00053	6	65	0.00214125	0.00992762
magenta	Phenylpropanoid biosynthesis	KEGG PATHWAY	zma00940	12	243	0.0033318	0.0147758
magenta	Terpenoid backbone biosynthesis	KEGG PATHWAY	zma00900	6	74	0.00390275	0.0165867
magenta	Pentose phosphate pathway	KEGG PATHWAY	zma00030	6	76	0.00440797	0.0179845
magenta	Carbon fixation in photosynthetic organisms	KEGG PATHWAY	zma00710	7	104	0.00493985	0.0187371
magenta	Pyrimidine metabolism	KEGG PATHWAY	zma00240	6	78	0.00495982	0.0187371
magenta	Taurine and hypotaurine metabolism	KEGG PATHWAY	zma00430	3	17	0.0058522	0.0213187
magenta	beta-Alanine metabolism	KEGG PATHWAY	zma00410	5	57	0.00606598	0.0213355
magenta	Purine metabolism	KEGG PATHWAY	zma00230	8	141	0.00716931	0.0243757
magenta	One carbon pool by folate	KEGG PATHWAY	zma00670	3	21	0.00983147	0.0323487
magenta3	Biosynthesis of secondary metabolites	KEGG PATHWAY	zma01110	16	1499	0.000118917	0.00535125
magenta3	Metabolic pathways	KEGG PATHWAY	zma01100	21	2943	0.00218948	0.0492634
magenta4	Fatty acid degradation	KEGG PATHWAY	zma00071	10	59	8.00985e-10	6.06373e-08
magenta4	Valine, leucine and isoleucine degradation	KEGG PATHWAY	zma00280	10	64	1.62469e-09	6.06373e-08
magenta4	Fatty acid metabolism	KEGG PATHWAY	zma01212	11	88	2.09094e-09	6.06373e-08
magenta4	Metabolic pathways	KEGG PATHWAY	zma01100	61	2943	5.16198e-09	1.12273e-07
magenta4	Biosynthesis of secondary metabolites	KEGG PATHWAY	zma01110	39	1499	1.44539e-08	2.51498e-07
magenta4	beta-Alanine metabolism	KEGG PATHWAY	zma00410	8	57	1.5072e-07	2.18544e-06
magenta4	Propanoate metabolism	KEGG PATHWAY	zma00640	7	45	4.89645e-07	6.08559e-06
magenta4	Glyoxylate and dicarboxylate metabolism	KEGG PATHWAY	zma00630	9	101	8.70922e-07	9.47128e-06
magenta4	Butanoate metabolism	KEGG PATHWAY	zma00650	5	34	2.83443e-05	0.000262639
magenta4	Lysine degradation	KEGG PATHWAY	zma00310	6	59	3.01884e-05	0.000262639
magenta4	Carbon metabolism	KEGG PATHWAY	zma01200	13	353	4.04903e-05	0.000320242
magenta4	Tryptophan metabolism	KEGG PATHWAY	zma00380	6	70	7.34042e-05	0.000532181
magenta4	Pyrimidine metabolism	KEGG PATHWAY	zma00240	6	78	0.00012833	0.000858824
magenta4	Pyruvate metabolism	KEGG PATHWAY	zma00620	7	118	0.000164483	0.00102214
magenta4	Synthesis and degradation of ketone bodies	KEGG PATHWAY	zma00072	3	10	0.000205171	0.00118999
magenta4	Autophagy - other	KEGG PATHWAY	zma04136	5	62	0.000385253	0.00209481
magenta4	Phenylalanine metabolism	KEGG PATHWAY	zma00360	4	36	0.000492668	0.0025213
magenta4	Arginine and proline metabolism	KEGG PATHWAY	zma00330	5	67	0.000537634	0.00259857
magenta4	Tyrosine metabolism	KEGG PATHWAY	zma00350	4	43	0.000914175	0.00418596
magenta4	2-Oxocarboxylic acid metabolism	KEGG PATHWAY	zma01210	5	81	0.00120536	0.00524333
magenta4	alpha-Linolenic acid metabolism	KEGG PATHWAY	zma00592	4	56	0.00227617	0.00942983
magenta4	MAPK signaling pathway - plant	KEGG PATHWAY	zma04016	7	204	0.00353211	0.0139679
magenta4	Biosynthesis of unsaturated fatty acids	KEGG PATHWAY	zma01040	3	32	0.00404323	0.0152462
magenta4	Peroxisome	KEGG PATHWAY	zma04146	5	110	0.00428214	0.0152462
magenta4	Pantothenate and CoA biosynthesis	KEGG PATHWAY	zma00770	3	33	0.00438108	0.0152462
magenta4	Porphyrin and chlorophyll metabolism	KEGG PATHWAY	zma00860	4	69	0.0046288	0.0154887
magenta4	Glutathione metabolism	KEGG PATHWAY	zma00480	5	128	0.00785075	0.0252969
magenta4	Tropane, piperidine and pyridine alkaloid biosynthesis	KEGG PATHWAY	zma00960	2	18	0.0143219	0.0445003
magenta4	Biosynthesis of amino acids	KEGG PATHWAY	zma01230	8	342	0.0163022	0.0489065
maroon	Photosynthesis	KEGG PATHWAY	zma00195	20	98	1.72888e-26	7.2613e-25
maroon	Metabolic pathways	KEGG PATHWAY	zma01100	48	2943	5.48247e-16	1.15132e-14
maroon	Carbon fixation in photosynthetic organisms	KEGG PATHWAY	zma00710	13	104	3.88413e-15	5.43778e-14
maroon	Photosynthesis - antenna proteins	KEGG PATHWAY	zma00196	8	29	3.0839e-12	3.2381e-11
maroon	Carbon metabolism	KEGG PATHWAY	zma01200	16	353	6.1764e-12	5.18817e-11
maroon	Biosynthesis of secondary metabolites	KEGG PATHWAY	zma01110	22	1499	5.85209e-07	4.09646e-06
maroon	Glyoxylate and dicarboxylate metabolism	KEGG PATHWAY	zma00630	5	101	9.23525e-05	0.000554115
maroon	Glycolysis / Gluconeogenesis	KEGG PATHWAY	zma00010	6	180	0.000149834	0.000786627
maroon	Pyruvate metabolism	KEGG PATHWAY	zma00620	5	118	0.000185821	0.000867165
maroon	Starch and sucrose metabolism	KEGG PATHWAY	zma00500	6	192	0.000210159	0.000882666
maroon	Porphyrin and chlorophyll metabolism	KEGG PATHWAY	zma00860	4	69	0.000269348	0.00102842
maroon	Pentose phosphate pathway	KEGG PATHWAY	zma00030	4	76	0.000382473	0.00133865
maroon	Biosynthesis of amino acids	KEGG PATHWAY	zma01230	6	342	0.00381014	0.0123097
maroon	Phenylalanine metabolism	KEGG PATHWAY	zma00360	2	36	0.0113347	0.034004
maroon	Arginine biosynthesis	KEGG PATHWAY	zma00220	2	43	0.0156567	0.0410989
maroon	Tyrosine metabolism	KEGG PATHWAY	zma00350	2	43	0.0156567	0.0410989
maroon	Ribosome	KEGG PATHWAY	zma03010	6	479	0.0176833	0.043688
mediumorchid	mRNA surveillance pathway	KEGG PATHWAY	zma03015	5	177	0.000747627	0.0196098
mediumorchid	Spliceosome	KEGG PATHWAY	zma03040	6	276	0.0008526	0.0196098
mediumorchid	Vitamin B6 metabolism	KEGG PATHWAY	zma00750	2	15	0.00195475	0.0299728
mediumorchid	Circadian rhythm - plant	KEGG PATHWAY	zma04712	3	77	0.00377684	0.0434337
mediumpurple3	Metabolic pathways	KEGG PATHWAY	zma01100	30	2943	7.06795e-07	3.95805e-05
mediumpurple3	Fatty acid metabolism	KEGG PATHWAY	zma01212	5	88	2.83071e-05	0.0007926
mediumpurple3	Fatty acid biosynthesis	KEGG PATHWAY	zma00061	4	57	8.54942e-05	0.00159589
mediumpurple3	Fatty acid degradation	KEGG PATHWAY	zma00071	3	59	0.00168314	0.0205895
mediumpurple3	Biosynthesis of secondary metabolites	KEGG PATHWAY	zma01110	14	1499	0.00183835	0.0205895
mediumpurple3	Fructose and mannose metabolism	KEGG PATHWAY	zma00051	3	83	0.00426437	0.0398008
mediumpurple3	Glycolysis / Gluconeogenesis	KEGG PATHWAY	zma00010	4	180	0.00529625	0.04237
mediumpurple4	Glutathione metabolism	KEGG PATHWAY	zma00480	7	128	0.000103541	0.00786915
navajowhite	Photosynthesis - antenna proteins	KEGG PATHWAY	zma00196	7	29	1.36689e-12	3.82729e-11
navajowhite	Metabolic pathways	KEGG PATHWAY	zma01100	24	2943	1.25264e-08	1.7537e-07
navajowhite	Photosynthesis	KEGG PATHWAY	zma00195	6	98	1.09208e-07	1.01927e-06
navajowhite	Porphyrin and chlorophyll metabolism	KEGG PATHWAY	zma00860	5	69	5.98116e-07	4.18681e-06
navajowhite	Biosynthesis of secondary metabolites	KEGG PATHWAY	zma01110	13	1499	2.21596e-05	0.000124094
navajowhite	Carbon fixation in photosynthetic organisms	KEGG PATHWAY	zma00710	3	104	0.00163523	0.00718145
navajowhite	Selenocompound metabolism	KEGG PATHWAY	zma00450	2	27	0.00179536	0.00718145
navajowhite	Oxidative phosphorylation	KEGG PATHWAY	zma00190	3	173	0.00661357	0.02114
navajowhite	Glycolysis / Gluconeogenesis	KEGG PATHWAY	zma00010	3	180	0.00735953	0.02114
navajowhite	Carbon metabolism	KEGG PATHWAY	zma01200	4	353	0.00754999	0.02114
orange	Ribosome	KEGG PATHWAY	zma03010	22	479	3.37287e-07	2.86694e-05
orange	Spliceosome	KEGG PATHWAY	zma03040	11	276	0.000900879	0.0382874
orange	Biosynthesis of amino acids	KEGG PATHWAY	zma01230	12	342	0.00153643	0.0435321
orangered1	Aminoacyl-tRNA biosynthesis	KEGG PATHWAY	zma00970	3	108	0.000615199	0.0129192
pink4	Protein processing in endoplasmic reticulum	KEGG PATHWAY	zma04141	9	291	1.14963e-09	3.90874e-08
pink4	N-Glycan biosynthesis	KEGG PATHWAY	zma00510	4	51	1.79618e-06	3.05351e-05
pink4	Endocytosis	KEGG PATHWAY	zma04144	5	246	4.90538e-05	0.000555943
pink4	Proteasome	KEGG PATHWAY	zma03050	3	94	0.000493207	0.00419226
pink4	Metabolic pathways	KEGG PATHWAY	zma01100	13	2943	0.000631372	0.00429333
pink4	Oxidative phosphorylation	KEGG PATHWAY	zma00190	3	173	0.00273483	0.0154974
purple	Plant-pathogen interaction	KEGG PATHWAY	zma04626	14	209	6.83697e-09	2.05109e-07
purple	MAPK signaling pathway - plant	KEGG PATHWAY	zma04016	7	204	0.00201886	0.0302829
sienna4	Photosynthesis	KEGG PATHWAY	zma00195	13	98	8.08683e-27	6.46946e-26
sienna4	Metabolic pathways	KEGG PATHWAY	zma01100	22	2943	4.26882e-20	1.70753e-19
sienna4	Oxidative phosphorylation	KEGG PATHWAY	zma00190	9	173	3.48739e-15	9.29971e-15
sienna4	Glyoxylate and dicarboxylate metabolism	KEGG PATHWAY	zma00630	2	101	0.00221279	0.00374605
sienna4	Carbon fixation in photosynthetic organisms	KEGG PATHWAY	zma00710	2	104	0.00234128	0.00374605
sienna4	Carbon metabolism	KEGG PATHWAY	zma01200	2	353	0.0238336	0.0317782
sienna4	Ribosome	KEGG PATHWAY	zma03010	2	479	0.041566	0.047504
skyblue2	Photosynthesis	KEGG PATHWAY	zma00195	3	98	0.00183962	0.038632
tan	Endocytosis	KEGG PATHWAY	zma04144	10	246	0.000128176	0.00640882
thistle1	Spliceosome	KEGG PATHWAY	zma03040	9	276	0.000134968	0.0076932
thistle1	Inositol phosphate metabolism	KEGG PATHWAY	zma00562	5	91	0.000464283	0.0132321
thistle1	Metabolic pathways	KEGG PATHWAY	zma01100	35	2943	0.000766502	0.0145635
yellowgreen	Metabolic pathways	KEGG PATHWAY	zma01100	30	2943	2.44788e-06	0.000134633
yellowgreen	Valine, leucine and isoleucine degradation	KEGG PATHWAY	zma00280	3	64	0.00247561	0.0418846
yellowgreen	Glycerophospholipid metabolism	KEGG PATHWAY	zma00564	4	142	0.00285872	0.0418846
yellowgreen	Biosynthesis of secondary metabolites	KEGG PATHWAY	zma01110	14	1499	0.00312359	0.0418846
yellowgreen	Alanine, aspartate and glutamate metabolism	KEGG PATHWAY	zma00250	3	75	0.00380769	0.0418846
