# Supplementary material for: Transcriptomic Analysis Reveals Candidate Genes Responding Maize Gray Leaf Spot Caused by Cercospora zeina
Source: Plants (Basel). 2021 Oct 22;10(11):2257. doi: 10.3390/plants10112257 (PMC8625984; doi:10.3390/plants10112257)
Supplement: Supplementary file 1 [file plants-10-02257-s001.zip › Table S6.xlsx]

## Sheet: Sheet1
Module	Hub Gene	kME_MM	Common Gene in R6	Common Gene in S8	Annotation
Grey60	GRMZM2G023436	0.993039	Yes	Yes	Ras-related protein RABA1f
Grey60	GRMZM2G027499	0.98654	Yes	Yes	Uncharacterized protein
Grey60	GRMZM2G035103	0.98563	Yes	Yes	Zinc finger protein AZF2
Grey60	GRMZM2G055052	0.986429	Yes	Yes	RING-type E3 ubiquitin transferase
Grey60	GRMZM2G055982	0.986333	Yes	Yes	Root-specific kinase 1
Grey60	GRMZM2G057779	0.987427	Yes	Yes	Unknown
Grey60	GRMZM2G099067	0.989528	Yes	Yes	Unknown
Grey60	GRMZM2G434203	0.988764	Yes	Yes	Ethylene-responsive transcription factor ERF025
Grey60	GRMZM2G475185	0.985181	Yes	Yes	Unknown
Grey60	GRMZM5G870176	0.990926	Yes	Yes	Putative cellulose synthase-like family protein
Purple	GRMZM2G016264	0.971423	Yes	Yes	Putative cytochrome P450 superfamily protein
Purple	GRMZM2G044537	0.9727	Yes	Yes	Unknown
Purple	GRMZM2G068239	0.987626	Yes	Yes	Unknown
Purple	GRMZM2G115357	0.979726	Yes	Yes	Auxin-responsive protein
Purple	GRMZM2G121565	0.971144	Yes	Yes	Putative inactive leucine-rich repeat receptor-like protein kinase
Purple	GRMZM2G132531	0.983535	Yes	Yes	Unknown
Purple	GRMZM2G159179	0.976444	Yes	Yes	Putative cytochrome P450 superfamily protein
Purple	GRMZM2G167492	0.97893	Yes	Yes	Putative NAC domain transcription factor superfamily protein
Purple	GRMZM2G179147	0.9726	Yes	Yes	Abscisic acid 8'-hydroxylase1
Purple	GRMZM2G467184	0.97863	Yes	Yes	Putative calcium-binding protein CML36
