# Supplementary material for: Transcriptomic Analysis Reveals Candidate Genes Responding Maize Gray Leaf Spot Caused by Cercospora zeina
Source: Plants (Basel). 2021 Oct 22;10(11):2257. doi: 10.3390/plants10112257 (PMC8625984; doi:10.3390/plants10112257)
Supplement: Supplementary file 1 [file plants-10-02257-s001.zip › Table S7.xlsx]

## Sheet: Sheet1
Table S7： Putative defense response genes that showed significant differences in expression between the GLS-susceptible and GLS-resistant lines following C. zeina inoculation
aSusceptible line S8, bhours post-inoculation, cResistant line R6, dLog2 R/S
Defense-related gene	Gene ID	Sa 0 hpib	S 6 hpi	S 24 hpi	S 144 hpi	S 240 hpi	Rc 0 hpi	R 6 hpi	R 24 hpi	R 144 hpi	R 240 hpi	0 hpi Fold Changed	6 hpi Fold Change	24 hpi Fold Change	144 hpi Fold Change	240 hpi Fold Change	Symbol	Description	KEGG_A_class	KEGG_B_class	Pathway	K_ID	GO Component	GO Function	GO Process
LRR	GRMZM2G046316	0.065	0.445	0.3	0.085	0.075	1.27	11.03	4.895	3.27	2.085	4.28824	4.63148	4.02827	5.26568	4.79701	-	Putative leucine-rich repeat protein kinase family protein [Source:UniProtKB/TrEMBL;Acc:K7VDJ5]	-	-	-	-	-	GO:0016772//transferase activity, transferring phosphorus-containing groups;GO:0001882//nucleoside binding;GO:0003824//catalytic activity;GO:0016301//kinase activity;GO:0097367//carbohydrate derivative binding;GO:0032555//purine ribonucleotide binding;GO:0043167//ion binding;GO:0032550//purine ribonucleoside binding;GO:1901363//heterocyclic compound binding;GO:0016740//transferase activity;GO:003…	GO:0006793//phosphorus metabolic process;GO:0036211//protein modification process;GO:0071704//organic substance metabolic process;GO:0006464//cellular protein modification process;GO:0009987//cellular process;GO:0044267//cellular protein metabolic process;GO:0043412//macromolecule modification;GO:0043170//macromolecule metabolic process;GO:0006468//protein phosphorylation;GO:0044260//cellular mac…
LRR	GRMZM2G079583	51.565	48.345	74.24	48.2	89.535	61.585	144.775	101.64	54.04	75.325	0.256187	1.58237	0.4532	0.164995	-0.249323	-	Putative leucine-rich repeat transmembrane protein kinase family protein isoform 1; Putative leucine-rich repeat transmembrane protein kinase family protein isoform 2; Putative leucine-rich repeat transmembrane protein kinase family protein isoform 3; Putative leucine-rich repeat transmembrane protein kinase family protein isoform 4; Uncharacterized protein [Source:UniProtKB/TrEMBL;Acc:B4FKZ8]	-	-	-	-	GO:0016021//integral component of membrane;GO:0044425//membrane part;GO:0031224//intrinsic component of membrane;GO:0016020//membrane	GO:0032559//adenyl ribonucleotide binding;GO:0032550//purine ribonucleoside binding;GO:0005488//binding;GO:1901363//heterocyclic compound binding;GO:0005524//ATP binding;GO:0004672//protein kinase activity;GO:0032549//ribonucleoside binding;GO:0016773//phosphotransferase activity, alcohol group as acceptor;GO:0030554//adenyl nucleotide binding;GO:0016772//transferase activity, transferring phosph…	GO:0006468//protein phosphorylation;GO:0006796//phosphate-containing compound metabolic process;GO:0036211//protein modification process;GO:0043170//macromolecule metabolic process;GO:0044237//cellular metabolic process;GO:0019538//protein metabolic process;GO:0008152//metabolic process;GO:0044267//cellular protein metabolic process;GO:0044238//primary metabolic process;GO:0009987//cellular proce…
LRR	GRMZM2G100234	0.11	0.415	0.51	0.19	0.375	0.945	1.005	1.615	0.215	0.515	3.10281	1.27601	1.66297	0.178337	0.457682	-	Putative leucine-rich repeat receptor-like protein kinase family protein [Source:UniProtKB/TrEMBL;Acc:K7V5E4]	-	-	-	-	GO:0016020//membrane;GO:0016021//integral component of membrane;GO:0031224//intrinsic component of membrane;GO:0044425//membrane part	GO:0030554//adenyl nucleotide binding;GO:0004672//protein kinase activity;GO:0016740//transferase activity;GO:0001883//purine nucleoside binding;GO:0032549//ribonucleoside binding;GO:0032559//adenyl ribonucleotide binding;GO:0000166//nucleotide binding;GO:0016772//transferase activity, transferring phosphorus-containing groups;GO:0016773//phosphotransferase activity, alcohol group as acceptor;GO:…	GO:0044267//cellular protein metabolic process;GO:0044260//cellular macromolecule metabolic process;GO:0071704//organic substance metabolic process;GO:0008152//metabolic process;GO:0019538//protein metabolic process;GO:0006468//protein phosphorylation;GO:0036211//protein modification process;GO:0006464//cellular protein modification process;GO:0006796//phosphate-containing compound metabolic proc…
LRR	GRMZM2G151567	7.065	27.41	11.13	4.79	3.95	31.675	166.295	86.595	39.44	31.665	2.16458	2.60097	2.95983	3.04156	3.00296	-	Putative leucine-rich repeat receptor-like protein kinase family protein [Source:UniProtKB/TrEMBL;Acc:K7UEJ0]	-	-	-	-	-	GO:0003824//catalytic activity;GO:0016301//kinase activity;GO:0097367//carbohydrate derivative binding;GO:0004672//protein kinase activity;GO:0000166//nucleotide binding;GO:0001882//nucleoside binding;GO:0043168//anion binding;GO:0036094//small molecule binding;GO:0032555//purine ribonucleotide binding;GO:0035639//purine ribonucleoside triphosphate binding;GO:0032549//ribonucleoside binding;GO:00…	GO:0006796//phosphate-containing compound metabolic process;GO:0044267//cellular protein metabolic process;GO:0006464//cellular protein modification process;GO:0044238//primary metabolic process;GO:0009987//cellular process;GO:0019538//protein metabolic process;GO:0044260//cellular macromolecule metabolic process;GO:0043170//macromolecule metabolic process;GO:0006793//phosphorus metabolic process…
EFR-like gene	GRMZM2G073884	0.29	2.35	1.575	0.59	0.2	14.455	21.845	33.935	8.47	3.885	5.63937	3.21657	4.42935	3.84358	4.27984	-	Putative leucine-rich repeat receptor-like protein kinase family protein [Source:UniProtKB/TrEMBL;Acc:K7VE90]	-	-	-	-	-	GO:0032553//ribonucleotide binding;GO:0016740//transferase activity;GO:0005488//binding;GO:0003824//catalytic activity;GO:0017076//purine nucleotide binding;GO:0030554//adenyl nucleotide binding;GO:1901265//nucleoside phosphate binding;GO:0043167//ion binding;GO:0097367//carbohydrate derivative binding;GO:0035639//purine ribonucleoside triphosphate binding;GO:0032550//purine ribonucleoside bindin…	GO:0044238//primary metabolic process;GO:0071704//organic substance metabolic process;GO:0009987//cellular process;GO:0044237//cellular metabolic process;GO:0019538//protein metabolic process;GO:0006796//phosphate-containing compound metabolic process;GO:0036211//protein modification process;GO:0044260//cellular macromolecule metabolic process;GO:0016310//phosphorylation;GO:0006793//phosphorus me…
LRR	GRMZM2G171114	0	0	0	0	0	0.25	0.345	0.735	0.6	0.325	7.96578	8.43045	9.5216	9.22882	8.3443	-	Putative leucine-rich repeat receptor-like protein kinase family protein [Source:UniProtKB/TrEMBL;Acc:K7UZS7]	-	-	-	-	GO:0031224//intrinsic component of membrane;GO:0016020//membrane;GO:0016021//integral component of membrane;GO:0044425//membrane part	GO:0005524//ATP binding;GO:0016301//kinase activity;GO:0032555//purine ribonucleotide binding;GO:0001882//nucleoside binding;GO:0017076//purine nucleotide binding;GO:0004672//protein kinase activity;GO:0043168//anion binding;GO:0016740//transferase activity;GO:1901363//heterocyclic compound binding;GO:0032553//ribonucleotide binding;GO:0003824//catalytic activity;GO:0032550//purine ribonucleoside…	GO:0009987//cellular process;GO:0036211//protein modification process;GO:0019538//protein metabolic process;GO:0044267//cellular protein metabolic process;GO:0044260//cellular macromolecule metabolic process;GO:0006464//cellular protein modification process;GO:0043170//macromolecule metabolic process;GO:0016310//phosphorylation;GO:0006796//phosphate-containing compound metabolic process;GO:007170…
LRR	GRMZM2G316907	0.385	1.05	1.085	0.49	0.27	2.565	1.3	1.67	0.68	0.45	2.73603	0.308122	0.622153	0.472753	0.736966	-	Putative leucine-rich repeat receptor-like protein kinase family protein [Source:UniProtKB/TrEMBL;Acc:K7V8D8]	-	-	-	-	GO:0044425//membrane part;GO:0016021//integral component of membrane;GO:0031224//intrinsic component of membrane;GO:0016020//membrane	GO:0016772//transferase activity, transferring phosphorus-containing groups;GO:1901363//heterocyclic compound binding;GO:0000166//nucleotide binding;GO:0032555//purine ribonucleotide binding;GO:0032550//purine ribonucleoside binding;GO:0043167//ion binding;GO:0001883//purine nucleoside binding;GO:0017076//purine nucleotide binding;GO:0005515//protein binding;GO:0016773//phosphotransferase activit…	GO:0006464//cellular protein modification process;GO:0006796//phosphate-containing compound metabolic process;GO:0036211//protein modification process;GO:0044238//primary metabolic process;GO:0044267//cellular protein metabolic process;GO:0044237//cellular metabolic process;GO:0006468//protein phosphorylation;GO:0009987//cellular process;GO:0044260//cellular macromolecule metabolic process;GO:001…
LRR	GRMZM2G350918	0.375	1.04	0.63	0.275	0.425	4.18	3.515	1.485	1.175	0.925	3.47854	1.75694	1.23704	2.09516	1.12199	-	Putative leucine-rich repeat receptor-like protein kinase family protein [Source:UniProtKB/TrEMBL;Acc:K7W9N1]	-	-	-	-	GO:0031224//intrinsic component of membrane;GO:0044425//membrane part;GO:0016021//integral component of membrane;GO:0016020//membrane	GO:0043168//anion binding;GO:0017076//purine nucleotide binding;GO:0097159//organic cyclic compound binding;GO:0000166//nucleotide binding;GO:0016773//phosphotransferase activity, alcohol group as acceptor;GO:0032555//purine ribonucleotide binding;GO:1901265//nucleoside phosphate binding;GO:0016740//transferase activity;GO:0043167//ion binding;GO:0036094//small molecule binding;GO:0016301//kinase…	GO:0009987//cellular process;GO:0043170//macromolecule metabolic process;GO:0036211//protein modification process;GO:0006468//protein phosphorylation;GO:0008152//metabolic process;GO:0044238//primary metabolic process;GO:0016310//phosphorylation;GO:0044260//cellular macromolecule metabolic process;GO:0006793//phosphorus metabolic process;GO:0006796//phosphate-containing compound metabolic process…
LRR	GRMZM2G389948	2.7	2.29	3.665	2.845	2.455	10.25	5.575	7.85	6.87	5.97	1.92459	1.28362	1.09888	1.27188	1.28201	-	Putative leucine-rich repeat receptor-like protein kinase family protein [Source:UniProtKB/TrEMBL;Acc:K7TSH2]	-	-	-	-	GO:0016021//integral component of membrane;GO:0016020//membrane;GO:0031224//intrinsic component of membrane;GO:0044425//membrane part	GO:0043167//ion binding;GO:0032549//ribonucleoside binding;GO:0005515//protein binding;GO:0016301//kinase activity;GO:1901363//heterocyclic compound binding;GO:0016772//transferase activity, transferring phosphorus-containing groups;GO:0032553//ribonucleotide binding;GO:0030554//adenyl nucleotide binding;GO:0035639//purine ribonucleoside triphosphate binding;GO:0032555//purine ribonucleotide bind…	GO:0008152//metabolic process;GO:0009987//cellular process;GO:0036211//protein modification process;GO:0044267//cellular protein metabolic process;GO:0006793//phosphorus metabolic process;GO:0044237//cellular metabolic process;GO:0006796//phosphate-containing compound metabolic process;GO:0071704//organic substance metabolic process;GO:0044260//cellular macromolecule metabolic process;GO:0019538/…
LRR	GRMZM2G421669	0	0	0.37	0.015	0.09	0.045	0.46	0.225	0.001	0.02	5.49185	8.84549	-0.7176	-3.90689	-2.16993	-	Putative leucine-rich repeat receptor-like protein kinase family protein [Source:UniProtKB/TrEMBL;Acc:K7UUB6]	-	-	-	-	GO:0044425//membrane part;GO:0016021//integral component of membrane;GO:0031224//intrinsic component of membrane;GO:0016020//membrane	GO:0016772//transferase activity, transferring phosphorus-containing groups;GO:0043168//anion binding;GO:0043167//ion binding;GO:0003824//catalytic activity;GO:0016301//kinase activity;GO:0097367//carbohydrate derivative binding;GO:0016773//phosphotransferase activity, alcohol group as acceptor;GO:0004674//protein serine/threonine kinase activity;GO:0005488//binding;GO:0036094//small molecule bin…	GO:0006468//protein phosphorylation;GO:0044238//primary metabolic process;GO:0043412//macromolecule modification;GO:0006796//phosphate-containing compound metabolic process;GO:0008152//metabolic process;GO:0043170//macromolecule metabolic process;GO:0006464//cellular protein modification process;GO:0044267//cellular protein metabolic process;GO:0016310//phosphorylation;GO:0036211//protein modific…
LRR	GRMZM2G702599	0	0	0	0	0	4.23	0.55	7.59	3.44	0.995	12.0464	9.10329	12.8899	11.7482	9.95855	-	Putative leucine-rich repeat receptor-like protein kinase family protein [Source:UniProtKB/TrEMBL;Acc:K7U631]	-	-	-	-	GO:0044425//membrane part;GO:0016021//integral component of membrane;GO:0031224//intrinsic component of membrane;GO:0016020//membrane	GO:0043167//ion binding;GO:0016301//kinase activity;GO:0036094//small molecule binding;GO:1901265//nucleoside phosphate binding;GO:0032559//adenyl ribonucleotide binding;GO:0003824//catalytic activity;GO:0001882//nucleoside binding;GO:0035639//purine ribonucleoside triphosphate binding;GO:0016772//transferase activity, transferring phosphorus-containing groups;GO:0032550//purine ribonucleoside bi…	GO:0043412//macromolecule modification;GO:0006793//phosphorus metabolic process;GO:0036211//protein modification process;GO:0009987//cellular process;GO:0016310//phosphorylation;GO:0006468//protein phosphorylation;GO:0071704//organic substance metabolic process;GO:0019538//protein metabolic process;GO:0008152//metabolic process;GO:0006464//cellular protein modification process;GO:0044237//cellula…
LRR	GRMZM2G082823	0.045	0.07	0	0.015	0.03	1.955	0.685	1.87	0.68	1.12	5.4411	3.29068	10.8688	5.5025	5.22239	-	Leucine-rich repeat (LRR) family protein [Source:UniProtKB/TrEMBL;Acc:K7UY23]	-	-	-	-	-	GO:0005515//protein binding;GO:0005488//binding	-
LRR	GRMZM2G151738	0.915	2.505	0.66	1.485	2.115	1.74	6.14	9.525	1.04	1.075	0.927244	1.29343	3.85118	-0.513879	-0.976321	-	Leucine-rich repeat (LRR) family protein; Uncharacterized protein [Source:UniProtKB/TrEMBL;Acc:B4FCT4]	-	-	-	-	-	GO:0005488//binding;GO:0005515//protein binding	-
LRR	GRMZM2G168917	1.325	0.425	0.525	1.145	1.21	1.92	3.67	1.415	0.745	1.895	0.535114	3.11025	1.43041	-0.620035	0.647191	-	Leucine-rich repeat receptor protein kinase EXS [Source:UniProtKB/TrEMBL;Acc:B6TE49]	-	-	-	-	-	GO:1901265//nucleoside phosphate binding;GO:0035639//purine ribonucleoside triphosphate binding;GO:0016772//transferase activity, transferring phosphorus-containing groups;GO:0016740//transferase activity;GO:0036094//small molecule binding;GO:0005488//binding;GO:0032559//adenyl ribonucleotide binding;GO:0001883//purine nucleoside binding;GO:0004672//protein kinase activity;GO:0032553//ribonucleot…	GO:0006468//protein phosphorylation;GO:0043412//macromolecule modification;GO:0016310//phosphorylation;GO:0006793//phosphorus metabolic process;GO:0009987//cellular process;GO:0044238//primary metabolic process;GO:0006464//cellular protein modification process;GO:0036211//protein modification process;GO:0044260//cellular macromolecule metabolic process;GO:0071704//organic substance metabolic proc…
LRR	GRMZM2G300133	5.705	9.175	5.525	5.945	13.36	16.185	14.81	24.405	14.535	35.905	1.50436	0.690792	2.14313	1.28978	1.42626	TD1	Leucine-rich repeat receptor-like kinase protein THICK TASSEL DWARF1 [Source:UniProtKB/Swiss-Prot;Acc:P0DL10]	-	-	-	-	GO:0016020//membrane;GO:0016021//integral component of membrane;GO:0044425//membrane part;GO:0031224//intrinsic component of membrane	GO:1901363//heterocyclic compound binding;GO:0032549//ribonucleoside binding;GO:0035639//purine ribonucleoside triphosphate binding;GO:0043168//anion binding;GO:0036094//small molecule binding;GO:0097367//carbohydrate derivative binding;GO:0000166//nucleotide binding;GO:0042802//identical protein binding;GO:0043167//ion binding;GO:0032559//adenyl ribonucleotide binding;GO:0016772//transferase act…	GO:0036211//protein modification process;GO:0006796//phosphate-containing compound metabolic process;GO:0051716//cellular response to stimulus;GO:0007165//signal transduction;GO:0023014//signal transduction by phosphorylation;GO:0065007//biological regulation;GO:0044267//cellular protein metabolic process;GO:0050793//regulation of developmental process;GO:0008152//metabolic process;GO:0009987//ce…
LRR	XLOC_004469	0.24	0.105	0.465	0.095	0.31	0.845	1.445	1.16	1.395	4.79	1.81592	3.78261	1.31882	3.87619	3.94969	TCONS_00009288	Elongation factor 1-alpha, partial [Medicago truncatula]	-	-	-	-	GO:0005622//intracellular;GO:0044464//cell part;GO:0044424//intracellular part;GO:0005623//cell	GO:0001883//purine nucleoside binding;GO:0097367//carbohydrate derivative binding;GO:0003723//RNA binding;GO:1901363//heterocyclic compound binding;GO:0017111//nucleoside-triphosphatase activity;GO:0097159//organic cyclic compound binding;GO:0003824//catalytic activity;GO:0016462//pyrophosphatase activity;GO:0008135//translation factor activity, RNA binding;GO:0001882//nucleoside binding;GO:00168…	GO:0044249//cellular biosynthetic process;GO:0009059//macromolecule biosynthetic process;GO:0043170//macromolecule metabolic process;GO:0034645//cellular macromolecule biosynthetic process;GO:0044260//cellular macromolecule metabolic process;GO:0009058//biosynthetic process;GO:0008152//metabolic process;GO:0044237//cellular metabolic process;GO:1901576//organic substance biosynthetic process;GO:0…
EF	GRMZM2G423129	1.95	0.22	1.39	0.1	0.52	28.79	7.915	8.165	12.525	8.025	3.88402	5.16901	2.55437	6.96867	3.94792	-	EF-hand Ca2+-binding protein CCD1 [Source:UniProtKB/TrEMBL;Acc:B6T0B8]	-	-	-	-	-	GO:0005488//binding;GO:0043167//ion binding;GO:0005515//protein binding;GO:0005509//calcium ion binding;GO:0046872//metal ion binding;GO:0043169//cation binding	GO:0090558//plant epidermis development;GO:0044710//single-organism metabolic process;GO:0090626//plant epidermis morphogenesis;GO:0044248//cellular catabolic process;GO:0042743//hydrogen peroxide metabolic process;GO:0044763//single-organism cellular process;GO:0000904//cell morphogenesis involved in differentiation;GO:0071840//cellular component organization or biogenesis;GO:0044712//single-org…
MAPK	GRMZM2G130213	0	0	0	0.03	0	3.145	1.785	3.03	2.91	2.29	11.6188	10.8017	11.5651	6.59991	11.1611	-	MAP kinase kinase 10 [Source:Projected from Arabidopsis thaliana (AT1G32320) TAIR;Acc:AT1G32320]	-	-	-	-	-	GO:0097159//organic cyclic compound binding;GO:0004712//protein serine/threonine/tyrosine kinase activity;GO:0043168//anion binding;GO:0005524//ATP binding;GO:0004708//MAP kinase kinase activity;GO:0005488//binding;GO:0016773//phosphotransferase activity, alcohol group as acceptor;GO:0003824//catalytic activity;GO:0032550//purine ribonucleoside binding;GO:1901265//nucleoside phosphate binding;GO:…	GO:0050794//regulation of cellular process;GO:0009967//positive regulation of signal transduction;GO:0051174//regulation of phosphorus metabolic process;GO:0006793//phosphorus metabolic process;GO:0043408//regulation of MAPK cascade;GO:0016310//phosphorylation;GO:0031325//positive regulation of cellular metabolic process;GO:0006464//cellular protein modification process;GO:0043549//regulation of …
MAP3K	GRMZM2G305066	1.9	0	0	1.255	1.875	9.275	0.395	0.215	0.51	1.67	2.28735	8.62571	7.74819	-1.29912	-0.167042	-	Putative MAPKKK family protein kinase [Source:UniProtKB/TrEMBL;Acc:K7VKT3]	-	-	-	-	-	GO:0004672//protein kinase activity;GO:0004674//protein serine/threonine kinase activity;GO:0016740//transferase activity;GO:0001883//purine nucleoside binding;GO:0032553//ribonucleotide binding;GO:1901265//nucleoside phosphate binding;GO:0001882//nucleoside binding;GO:0032549//ribonucleoside binding;GO:0005488//binding;GO:1901363//heterocyclic compound binding;GO:0097367//carbohydrate derivative…	GO:0006793//phosphorus metabolic process;GO:0044238//primary metabolic process;GO:0006796//phosphate-containing compound metabolic process;GO:0043412//macromolecule modification;GO:0016310//phosphorylation;GO:0036211//protein modification process;GO:0044237//cellular metabolic process;GO:0019538//protein metabolic process;GO:0006468//protein phosphorylation;GO:0009987//cellular process;GO:0043170…
MAPK	GRMZM2G375975	0	0	0	0	0	0.33	0.215	0.755	0.675	1.215	8.36632	7.74819	9.56033	9.39874	10.2467	-	Putative MAP kinase family protein [Source:UniProtKB/TrEMBL;Acc:K7VK23]	-	-	-	-	-	GO:0032555//purine ribonucleotide binding;GO:0004871//signal transducer activity;GO:0001882//nucleoside binding;GO:1901265//nucleoside phosphate binding;GO:0032553//ribonucleotide binding;GO:0003824//catalytic activity;GO:0001883//purine nucleoside binding;GO:0035639//purine ribonucleoside triphosphate binding;GO:0016301//kinase activity;GO:0036094//small molecule binding;GO:0000166//nucleotide b…	GO:0007154//cell communication;GO:0006793//phosphorus metabolic process;GO:0051716//cellular response to stimulus;GO:0006796//phosphate-containing compound metabolic process;GO:0044237//cellular metabolic process;GO:0016310//phosphorylation;GO:0023052//signaling;GO:0071704//organic substance metabolic process;GO:0009987//cellular process;GO:0036211//protein modification process;GO:0050794//regula…
RFO1	GRMZM2G145109	0.92	0.2	2.16	0.495	0.41	10.995	8.405	13.17	2.735	4.05	3.57907	5.39318	2.60815	2.46604	3.30423	-	Uncharacterized protein [Source:UniProtKB/TrEMBL;Acc:B4F8T7]	-	-	-	-	-	GO:0097367//carbohydrate derivative binding;GO:0004674//protein serine/threonine kinase activity;GO:0001882//nucleoside binding;GO:0001871//pattern binding;GO:0016773//phosphotransferase activity, alcohol group as acceptor;GO:0005524//ATP binding;GO:0043168//anion binding;GO:1901363//heterocyclic compound binding;GO:0046872//metal ion binding;GO:0032559//adenyl ribonucleotide binding;GO:0005488//…	GO:0008152//metabolic process;GO:0036211//protein modification process;GO:0009987//cellular process;GO:0006464//cellular protein modification process;GO:0044238//primary metabolic process;GO:0019538//protein metabolic process;GO:0043412//macromolecule modification;GO:0016310//phosphorylation;GO:0044260//cellular macromolecule metabolic process;GO:0006793//phosphorus metabolic process;GO:0043170//…
PIC17	GRMZM2G032602	97.365	2.46	4.825	7.705	4.22	137.065	11.555	4.51	3.965	3.13	0.493385	2.23179	-0.0974015	-0.958474	-0.43108	-	Disease resistance gene analog PIC17 [Source:UniProtKB/TrEMBL;Acc:Q9ZTI8]	-	-	-	-	GO:0005886//plasma membrane;GO:0071944//cell periphery;GO:0016020//membrane;GO:0005623//cell;GO:0044464//cell part	GO:0036094//small molecule binding;GO:0035639//purine ribonucleoside triphosphate binding;GO:0032555//purine ribonucleotide binding;GO:0097159//organic cyclic compound binding;GO:0097367//carbohydrate derivative binding;GO:0017076//purine nucleotide binding;GO:0000166//nucleotide binding;GO:0032559//adenyl ribonucleotide binding;GO:0030554//adenyl nucleotide binding;GO:0043167//ion binding;GO:000…	GO:0045088//regulation of innate immune response;GO:0009814//defense response, incompatible interaction;GO:0016043//cellular component organization;GO:0046394//carboxylic acid biosynthetic process;GO:0019438//aromatic compound biosynthetic process;GO:1901701//cellular response to oxygen-containing compound;GO:0051234//establishment of localization;GO:0009867//jasmonic acid mediated signaling path…
RPP8-	XLOC_021615	0	0	0	0	0	30.75	0.29	14.605	4.625	10.875	14.9083	8.17991	13.8342	12.1752	13.4087	TCONS_00043528	PREDICTED: disease resistance RPP8-like protein 3 [Zea mays]	-	-	-	-	-	GO:0097159//organic cyclic compound binding;GO:0032550//purine ribonucleoside binding;GO:0001883//purine nucleoside binding;GO:0036094//small molecule binding;GO:0005488//binding;GO:1901363//heterocyclic compound binding;GO:0097367//carbohydrate derivative binding;GO:0001882//nucleoside binding;GO:0032549//ribonucleoside binding	-
RPP8-	XLOC_021616	0	0	0	0	0	25.12	1.125	9.63	2.19	3.135	14.6165	10.1357	13.2333	11.0967	11.6142	TCONS_00043529	PREDICTED: disease resistance RPP8-like protein 3 [Zea mays]	-	-	-	-	-	GO:0032550//purine ribonucleoside binding;GO:0032549//ribonucleoside binding;GO:0097367//carbohydrate derivative binding;GO:1901363//heterocyclic compound binding;GO:0005488//binding;GO:0097159//organic cyclic compound binding;GO:0001882//nucleoside binding;GO:0001883//purine nucleoside binding;GO:0036094//small molecule binding	-
RPM1-	XLOC_042398	0	0	0	0	0	1.77	1.17	1.32	0.605	0.64	10.7895	10.1923	10.3663	9.24079	9.32193	TCONS_00085544	PREDICTED: disease resistance protein RPM1-like [Setaria italica]	-	-	-	-	-	-	-
PEN1	GRMZM2G044527	3.05	2.49	3.6	2.29	3.76	17.04	14.595	22.265	14.34	12.14	2.48204	2.55126	2.62871	2.64663	1.69096	-	Syntaxin 132 [Source:UniProtKB/TrEMBL;Acc:B6U7P5]	-	-	-	-	GO:0071944//cell periphery;GO:0005886//plasma membrane;GO:0044464//cell part;GO:0005623//cell;GO:0016020//membrane	GO:0005484//SNAP receptor activity;GO:0005515//protein binding;GO:0005488//binding	GO:0071840//cellular component organization or biogenesis;GO:0051641//cellular localization;GO:0097305//response to alcohol;GO:0010033//response to organic substance;GO:0006886//intracellular protein transport;GO:0061024//membrane organization;GO:0034613//cellular protein localization;GO:0051234//establishment of localization;GO:1901700//response to oxygen-containing compound;GO:0051649//establis…
PEN2-like genes	GRMZM2G008247	0.065	0.775	0.065	0	0.06	2.985	1.13	6.255	0.82	0.465	5.52115	0.544055	6.58843	9.67948	2.9542	-	Beta-glucosidase2 [Source:UniProtKB/TrEMBL;Acc:K7TGE1]	Metabolism	Carbohydrate metabolism;Metabolism of other amino acids;Biosynthesis of other secondary metabolites	ko00500//Starch and sucrose metabolism;ko00940//Phenylpropanoid biosynthesis;ko00460//Cyanoamino acid metabolism	K01188	-	GO:0016787//hydrolase activity;GO:0004553//hydrolase activity, hydrolyzing O-glycosyl compounds;GO:0016798//hydrolase activity, acting on glycosyl bonds;GO:0003824//catalytic activity	GO:0005975//carbohydrate metabolic process;GO:0008152//metabolic process;GO:0071704//organic substance metabolic process;GO:0044238//primary metabolic process
PEN2-like genes	GRMZM2G146192	0.385	0.45	0.465	0.395	0.295	4.5	0.46	4.665	1.515	0.78	3.54699	0.0317089	3.32657	1.93939	1.40276	-	Auxin-induced beta-glucosidase; Putative O-Glycosyl hydrolase superfamily protein [Source:UniProtKB/TrEMBL;Acc:B6SWK9]	-	-	-	-	GO:0005618//cell wall;GO:0044464//cell part;GO:0048046//apoplast;GO:0071944//cell periphery;GO:0005576//extracellular region;GO:0005623//cell;GO:0009505//plant-type cell wall;GO:0030312//external encapsulating structure	GO:0046556//alpha-L-arabinofuranosidase activity;GO:0003824//catalytic activity;GO:0004553//hydrolase activity, hydrolyzing O-glycosyl compounds;GO:0016798//hydrolase activity, acting on glycosyl bonds;GO:0016787//hydrolase activity	GO:0061458//reproductive system development;GO:0032501//multicellular organismal process;GO:0009791//post-embryonic development;GO:0005975//carbohydrate metabolic process;GO:0048316//seed development;GO:0044767//single-organism developmental process;GO:0044707//single-multicellular organism process;GO:0032502//developmental process;GO:0071704//organic substance metabolic process;GO:0044699//singl…
EDR1	GRMZM2G448213	0.97	0.385	0.875	0.545	0.67	1.69	3.065	2.115	1.345	2.11	0.800967	2.99296	1.2733	1.30328	1.65501	-	Protein kinase domain superfamily protein [Source:UniProtKB/TrEMBL;Acc:K7UNV5]	-	-	-	-	-	GO:0097159//organic cyclic compound binding;GO:0030554//adenyl nucleotide binding;GO:0005488//binding;GO:0017076//purine nucleotide binding;GO:0043168//anion binding;GO:0016301//kinase activity;GO:0016740//transferase activity;GO:0016773//phosphotransferase activity, alcohol group as acceptor;GO:0000166//nucleotide binding;GO:0035639//purine ribonucleoside triphosphate binding;GO:0032555//purine …	GO:0050896//response to stimulus;GO:0044699//single-organism process;GO:0009987//cellular process;GO:0050794//regulation of cellular process;GO:0044763//single-organism cellular process;GO:0006468//protein phosphorylation;GO:0065007//biological regulation;GO:0044238//primary metabolic process;GO:0071704//organic substance metabolic process;GO:0050789//regulation of biological process;GO:0006793//…
EDR1	XLOC_040285	0	0	0	0.08	0	5.77	4.73	7.245	5.48	5.52	12.4944	12.2076	12.8228	6.09803	12.4305	TCONS_00081308	protein kinase domain containing protein [Zea mays]	-	-	-	-	GO:0032991//macromolecular complex;GO:0043228//non-membrane-bounded organelle;GO:0044446//intracellular organelle part;GO:0043227//membrane-bounded organelle;GO:0043232//intracellular non-membrane-bounded organelle;GO:0044430//cytoskeletal part;GO:0005856//cytoskeleton;GO:0043231//intracellular membrane-bounded organelle;GO:0015630//microtubule cytoskeleton;GO:0005623//cell;GO:0043234//protein co…	GO:0097159//organic cyclic compound binding;GO:0005488//binding;GO:0016818//hydrolase activity, acting on acid anhydrides, in phosphorus-containing anhydrides;GO:0016740//transferase activity;GO:0005515//protein binding;GO:0016817//hydrolase activity, acting on acid anhydrides;GO:0016301//kinase activity;GO:0032549//ribonucleoside binding;GO:0008092//cytoskeletal protein binding;GO:0001883//purin…	GO:0043170//macromolecule metabolic process;GO:0044260//cellular macromolecule metabolic process;GO:0007017//microtubule-based process;GO:0019538//protein metabolic process;GO:0032502//developmental process;GO:0044699//single-organism process;GO:0007568//aging;GO:0006464//cellular protein modification process;GO:0009987//cellular process;GO:0043412//macromolecule modification;GO:0044267//cellular…
PR1	GRMZM2G465226	658.74	2431.8	2718.99	1568.49	2071.35	7935.01	14756.1	10337.2	8894.16	3372.45	3.59045	2.60122	1.9267	2.50348	0.703228	-	Uncharacterized protein [Source:UniProtKB/TrEMBL;Acc:B4FVP5]	-	-	-	-	GO:0005576//extracellular region	-	-
PR2	GRMZM2G020898	2.38	1.79	2.295	3.62	2.535	7.18	4.315	6.535	13.91	8.595	1.59302	1.2694	1.50969	1.94206	1.76151	-	Glucan endo-1,3-beta-glucosidase 5; Uncharacterized protein [Source:UniProtKB/TrEMBL;Acc:B4FB19]	-	-	-	-	GO:0016020//membrane;GO:0031225//anchored component of membrane;GO:0031224//intrinsic component of membrane;GO:0071944//cell periphery;GO:0044425//membrane part;GO:0046658//anchored component of plasma membrane;GO:0044464//cell part;GO:0031226//intrinsic component of plasma membrane;GO:0005886//plasma membrane;GO:0044459//plasma membrane part;GO:0005623//cell	GO:0016798//hydrolase activity, acting on glycosyl bonds;GO:0004553//hydrolase activity, hydrolyzing O-glycosyl compounds;GO:0003824//catalytic activity;GO:0016787//hydrolase activity	GO:0071704//organic substance metabolic process;GO:0044238//primary metabolic process;GO:0008152//metabolic process;GO:0005975//carbohydrate metabolic process
PRm3	GRMZM2G052175	0	0	0	0.22	1.525	0.001	13.305	4.115	5.675	6.99	0	13.6997	12.0067	4.68904	2.19648	-	Endochitinase A [Source:UniProtKB/TrEMBL;Acc:B6SZA3]	-	-	-	-	GO:0071944//cell periphery;GO:0005618//cell wall;GO:0044464//cell part;GO:0030312//external encapsulating structure;GO:0005623//cell	GO:0016798//hydrolase activity, acting on glycosyl bonds;GO:0004553//hydrolase activity, hydrolyzing O-glycosyl compounds;GO:0016787//hydrolase activity;GO:0003824//catalytic activity;GO:0004568//chitinase activity	GO:0009057//macromolecule catabolic process;GO:0046348//amino sugar catabolic process;GO:0048608//reproductive structure development;GO:0071704//organic substance metabolic process;GO:0009793//embryo development ending in seed dormancy;GO:0022414//reproductive process;GO:0044237//cellular metabolic process;GO:0032501//multicellular organismal process;GO:0044260//cellular macromolecule metabolic p…
PRm3	GRMZM2G145461	326.665	2666.82	886.54	849.78	630.71	1019.22	7906.59	5853.22	2661.04	671.065	1.64158	1.56793	2.72297	1.64683	0.0894757	-	Chitinase2 [Source:UniProtKB/TrEMBL;Acc:K7UGV4]	-	-	-	-	-	GO:0097367//carbohydrate derivative binding;GO:0004568//chitinase activity;GO:0004553//hydrolase activity, hydrolyzing O-glycosyl compounds;GO:0016787//hydrolase activity;GO:0008061//chitin binding;GO:0016798//hydrolase activity, acting on glycosyl bonds;GO:0005488//binding;GO:0003824//catalytic activity	GO:0044248//cellular catabolic process;GO:0006026//aminoglycan catabolic process;GO:0006040//amino sugar metabolic process;GO:0071704//organic substance metabolic process;GO:0016998//cell wall macromolecule catabolic process;GO:1901135//carbohydrate derivative metabolic process;GO:0009056//catabolic process;GO:0008152//metabolic process;GO:1901564//organonitrogen compound metabolic process;GO:190…
PR6	GRMZM2G447795	2.585	10.345	5.295	3.015	5.055	4	51.335	25.63	26.15	144.185	0.629836	2.31101	2.27513	3.11658	4.83407	-	Xylanase inhibitor protein 1 [Source:UniProtKB/TrEMBL;Acc:K7V2D7]	-	-	-	-	GO:0043231//intracellular membrane-bounded organelle;GO:0043227//membrane-bounded organelle;GO:0031982//vesicle;GO:0005737//cytoplasm;GO:0031410//cytoplasmic vesicle;GO:0044424//intracellular part;GO:0031988//membrane-bounded vesicle;GO:0005622//intracellular;GO:0005623//cell;GO:0043229//intracellular organelle;GO:0044444//cytoplasmic part;GO:0016023//cytoplasmic membrane-bounded vesicle;GO:00432…	GO:0098772//molecular function regulator;GO:0016787//hydrolase activity;GO:0003824//catalytic activity;GO:0030234//enzyme regulator activity;GO:0004857//enzyme inhibitor activity;GO:0004553//hydrolase activity, hydrolyzing O-glycosyl compounds;GO:0016798//hydrolase activity, acting on glycosyl bonds	GO:0010383//cell wall polysaccharide metabolic process;GO:0043170//macromolecule metabolic process;GO:0016052//carbohydrate catabolic process;GO:0044260//cellular macromolecule metabolic process;GO:0071554//cell wall organization or biogenesis;GO:0032940//secretion by cell;GO:0009987//cellular process;GO:0005975//carbohydrate metabolic process;GO:0050789//regulation of biological process;GO:00469…
PR6	GRMZM2G400999	0.855	0.065	0.34	0.035	0.19	3.54	1.35	3.03	2.955	6.995	2.04975	4.37638	3.15571	6.39966	5.20225	-	Xylanase inhibitor protein 1 [Source:UniProtKB/TrEMBL;Acc:K7TWD3]	-	-	-	-	GO:0005737//cytoplasm;GO:0043227//membrane-bounded organelle;GO:0044464//cell part;GO:0043229//intracellular organelle;GO:0043231//intracellular membrane-bounded organelle;GO:0005623//cell;GO:0005622//intracellular;GO:0044424//intracellular part;GO:0031410//cytoplasmic vesicle;GO:0043226//organelle;GO:0031988//membrane-bounded vesicle;GO:0044444//cytoplasmic part;GO:0031982//vesicle;GO:0016023//c…	GO:0004857//enzyme inhibitor activity;GO:0003824//catalytic activity;GO:0016787//hydrolase activity;GO:0098772//molecular function regulator;GO:0004553//hydrolase activity, hydrolyzing O-glycosyl compounds;GO:0030234//enzyme regulator activity;GO:0016798//hydrolase activity, acting on glycosyl bonds	GO:0043170//macromolecule metabolic process;GO:0065007//biological regulation;GO:0010383//cell wall polysaccharide metabolic process;GO:0044238//primary metabolic process;GO:0019222//regulation of metabolic process;GO:0051179//localization;GO:0000272//polysaccharide catabolic process;GO:0009056//catabolic process;GO:0065009//regulation of molecular function;GO:1901575//organic substance catabolic…
PR6	GRMZM2G328171	0.33	3.42	0.62	4.53	6.225	38.17	130.555	37.665	30.22	122.7	6.85383	5.25452	5.92481	2.73792	4.30092	-	Xylanase inhibitor protein 1 [Source:UniProtKB/TrEMBL;Acc:B6SGT3]	-	-	-	-	-	GO:0004553//hydrolase activity, hydrolyzing O-glycosyl compounds;GO:0003824//catalytic activity;GO:0016798//hydrolase activity, acting on glycosyl bonds;GO:0016787//hydrolase activity	GO:0043170//macromolecule metabolic process;GO:0010410//hemicellulose metabolic process;GO:0016052//carbohydrate catabolic process;GO:0044260//cellular macromolecule metabolic process;GO:0009057//macromolecule catabolic process;GO:0009987//cellular process;GO:0045491//xylan metabolic process;GO:0071704//organic substance metabolic process;GO:1901575//organic substance catabolic process;GO:0044036…
PR6	GRMZM2G007928	32.515	90.52	35.235	103.82	47.9	197.425	293.205	358.62	338.175	385.415	2.60213	1.6956	3.34737	1.70369	3.00832	-	Bowman-Birk type trypsin inhibitor [Source:UniProtKB/TrEMBL;Acc:B6T022]	-	-	-	-	GO:0005576//extracellular region	GO:0061135//endopeptidase regulator activity;GO:0004857//enzyme inhibitor activity;GO:0061134//peptidase regulator activity;GO:0004867//serine-type endopeptidase inhibitor activity;GO:0030414//peptidase inhibitor activity;GO:0004866//endopeptidase inhibitor activity;GO:0030234//enzyme regulator activity;GO:0098772//molecular function regulator	-
PR9	GRMZM2G070603	0.535	0.52	0.56	0.67	0.29	10.465	1.58	7.25	4.575	6.01	4.28989	1.60334	3.69448	2.77154	4.37324	-	Peroxidase 1 [Source:UniProtKB/TrEMBL;Acc:K7V8K5]	-	-	-	-	GO:0005576//extracellular region	GO:0046906//tetrapyrrole binding;GO:0046872//metal ion binding;GO:0005488//binding;GO:0043169//cation binding;GO:0016684//oxidoreductase activity, acting on peroxide as acceptor;GO:0004601//peroxidase activity;GO:0097159//organic cyclic compound binding;GO:0020037//heme binding;GO:0016491//oxidoreductase activity;GO:0043167//ion binding;GO:0003824//catalytic activity;GO:0016209//antioxidant activ…	GO:0006950//response to stress;GO:0055114//oxidation-reduction process;GO:0006979//response to oxidative stress;GO:0044699//single-organism process;GO:0050896//response to stimulus;GO:0044710//single-organism metabolic process;GO:0008152//metabolic process
PR9	GRMZM2G135108	2.15	15.42	22.595	1.465	0.55	6.11	60.44	114.935	5.06	1.075	1.50684	1.9707	2.34674	1.78824	0.966833	-	Peroxidase [Source:UniProtKB/TrEMBL;Acc:K7UHV3]	-	-	-	-	-	GO:0043167//ion binding;GO:0016684//oxidoreductase activity, acting on peroxide as acceptor;GO:1901363//heterocyclic compound binding;GO:0097159//organic cyclic compound binding;GO:0046872//metal ion binding;GO:0020037//heme binding;GO:0003824//catalytic activity;GO:0043169//cation binding;GO:0016491//oxidoreductase activity;GO:0046906//tetrapyrrole binding;GO:0004601//peroxidase activity;GO:0016…	GO:0050896//response to stimulus;GO:0044710//single-organism metabolic process;GO:0006979//response to oxidative stress;GO:0008152//metabolic process;GO:0006950//response to stress;GO:0055114//oxidation-reduction process;GO:0044699//single-organism process
PR10	GRMZM2G075283	37.105	33.76	81.23	42.565	59.825	155.09	1293.62	710.47	288.3	112.03	2.06342	5.25996	3.12869	2.75983	0.905065	-	Pathogeneis protein 10; Pathogenesis-related protein 10; Uncharacterized protein [Source:UniProtKB/TrEMBL;Acc:B6SQM6]	-	-	-	-	-	-	GO:0050896//response to stimulus;GO:0006950//response to stress;GO:0009607//response to biotic stimulus;GO:0006952//defense response
PR10	GRMZM2G112538	35.74	45.32	57.035	35.275	25.01	101.86	450.885	168.87	54	47.05	1.51098	3.31454	1.56599	0.614313	0.91169	-	Pathogenesis-related protein 10; Uncharacterized protein [Source:UniProtKB/TrEMBL;Acc:Q29SB6]	-	-	-	-	-	-	GO:0006950//response to stress;GO:0009607//response to biotic stimulus;GO:0050896//response to stimulus;GO:0006952//defense response
WRKY	GRMZM2G048450	0.485	1.525	3.415	1.11	0.575	1.335	13.17	8.225	2.69	2.64	1.46078	3.11037	1.26813	1.27705	2.1989	-	Uncharacterized protein; WRKY transcription factor [Source:UniProtKB/TrEMBL;Acc:C0HGB4]	-	-	-	-	-	GO:0005488//binding;GO:0003677//DNA binding;GO:0003700//sequence-specific DNA binding transcription factor activity;GO:1901363//heterocyclic compound binding;GO:0097159//organic cyclic compound binding;GO:0043565//sequence-specific DNA binding;GO:0001071//nucleic acid binding transcription factor activity;GO:0003676//nucleic acid binding	GO:2000112//regulation of cellular macromolecule biosynthetic process;GO:0051171//regulation of nitrogen compound metabolic process;GO:0050789//regulation of biological process;GO:0060255//regulation of macromolecule metabolic process;GO:0065007//biological regulation;GO:0010556//regulation of macromolecule biosynthetic process;GO:1903506//regulation of nucleic acid-templated transcription;GO:005…
WRKY	GRMZM2G148561	17.975	3.68	3.185	2.32	2.15	42.26	17.985	8.44	8.24	8.01	1.2333	2.28902	1.40595	1.82852	1.89747	-	Putative WRKY DNA-binding domain superfamily protein [Source:UniProtKB/TrEMBL;Acc:K7TVL8]	-	-	-	-	-	GO:1901363//heterocyclic compound binding;GO:0001071//nucleic acid binding transcription factor activity;GO:0003700//sequence-specific DNA binding transcription factor activity;GO:0003677//DNA binding;GO:0003676//nucleic acid binding;GO:0043565//sequence-specific DNA binding;GO:0097159//organic cyclic compound binding;GO:0005488//binding	GO:0010468//regulation of gene expression;GO:2000112//regulation of cellular macromolecule biosynthetic process;GO:0010556//regulation of macromolecule biosynthetic process;GO:0009889//regulation of biosynthetic process;GO:0050789//regulation of biological process;GO:0060255//regulation of macromolecule metabolic process;GO:0019222//regulation of metabolic process;GO:0006355//regulation of transc…
WRKY	GRMZM2G453571	0.955	2.59	1.48	0.71	0.335	1.385	4.97	6.12	2.505	2.225	0.536313	0.940294	2.04793	1.81892	2.73157	-	Putative WRKY DNA-binding domain superfamily protein [Source:UniProtKB/TrEMBL;Acc:K7UMU4]	-	-	-	-	-	GO:0001071//nucleic acid binding transcription factor activity;GO:0003677//DNA binding;GO:1901363//heterocyclic compound binding;GO:0003676//nucleic acid binding;GO:0003700//sequence-specific DNA binding transcription factor activity;GO:0005488//binding;GO:0097159//organic cyclic compound binding;GO:0043565//sequence-specific DNA binding	GO:0051252//regulation of RNA metabolic process;GO:0010556//regulation of macromolecule biosynthetic process;GO:0080090//regulation of primary metabolic process;GO:0050794//regulation of cellular process;GO:0019222//regulation of metabolic process;GO:0031326//regulation of cellular biosynthetic process;GO:2001141//regulation of RNA biosynthetic process;GO:1903506//regulation of nucleic acid-templ…
WRKY	XLOC_039497	0.695	0.74	0.39	0.16	0.425	1.62	1.13	4.325	1.445	0.83	1.22091	0.610726	3.47115	3.17493	0.965648	TCONS_00079955	PREDICTED: WRKY DNA binding domain containing protein isoform X1 [Zea mays]	-	-	-	-	-	GO:0097159//organic cyclic compound binding;GO:0005488//binding;GO:0003677//DNA binding;GO:1901363//heterocyclic compound binding;GO:0003676//nucleic acid binding	GO:0010467//gene expression;GO:0071704//organic substance metabolic process;GO:0043170//macromolecule metabolic process;GO:0008152//metabolic process
TGA	GRMZM2G361611	0.74	1.51	0.315	0.36	0.575	4.64	2.305	1.99	1.76	0.99	2.64853	0.610218	2.65934	2.28951	0.783867	-	Ocs element-binding factor 1; Putative bZIP transcription factor superfamily protein [Source:UniProtKB/TrEMBL;Acc:B6UHQ6]	-	-	-	-	-	GO:0005488//binding;GO:0001071//nucleic acid binding transcription factor activity;GO:1901363//heterocyclic compound binding;GO:0043565//sequence-specific DNA binding;GO:0003700//sequence-specific DNA binding transcription factor activity;GO:0097159//organic cyclic compound binding;GO:0003677//DNA binding;GO:0003676//nucleic acid binding	GO:0009889//regulation of biosynthetic process;GO:0019219//regulation of nucleobase-containing compound metabolic process;GO:0051252//regulation of RNA metabolic process;GO:0050789//regulation of biological process;GO:0031326//regulation of cellular biosynthetic process;GO:2000112//regulation of cellular macromolecule biosynthetic process;GO:0019222//regulation of metabolic process;GO:1903506//re…
LOX	GRMZM2G106748	1.15	0.41	0.565	0.19	0.79	5.11	0.41	5.505	1.63	2.645	2.15169	0	3.28442	3.1008	1.74334	-	Lipoxygenase [Source:UniProtKB/TrEMBL;Acc:A1XCI7]	Metabolism	Lipid metabolism	ko00592//alpha-Linolenic acid metabolism;ko00591//Linoleic acid metabolism	K00454	-	GO:0046872//metal ion binding;GO:0016701//oxidoreductase activity, acting on single donors with incorporation of molecular oxygen;GO:0016702//oxidoreductase activity, acting on single donors with incorporation of molecular oxygen, incorporation of two atoms of oxygen;GO:0046914//transition metal ion binding;GO:0016491//oxidoreductase activity;GO:0005488//binding;GO:0051213//dioxygenase activity;G…	GO:0044255//cellular lipid metabolic process;GO:1901576//organic substance biosynthetic process;GO:0044699//single-organism process;GO:0008152//metabolic process;GO:0008610//lipid biosynthetic process;GO:0006631//fatty acid metabolic process;GO:0044710//single-organism metabolic process;GO:0055114//oxidation-reduction process;GO:0043436//oxoacid metabolic process;GO:0009058//biosynthetic process;…
LOX	GRMZM2G109130	7.54	8.685	7.105	14.075	28.575	67.31	134.775	53.925	41.94	127.175	3.15818	3.95588	2.92405	1.57519	2.15399	-	Lipoxygenase [Source:UniProtKB/TrEMBL;Acc:Q8W0V2]	Metabolism	Lipid metabolism	ko00591//Linoleic acid metabolism	K15718	GO:0043231//intracellular membrane-bounded organelle;GO:0043229//intracellular organelle;GO:0044444//cytoplasmic part;GO:0043226//organelle;GO:0009536//plastid;GO:0005622//intracellular;GO:0009507//chloroplast;GO:0044464//cell part;GO:0005737//cytoplasm;GO:0043227//membrane-bounded organelle;GO:0005623//cell;GO:0044424//intracellular part	GO:0046872//metal ion binding;GO:0016491//oxidoreductase activity;GO:0046914//transition metal ion binding;GO:0016702//oxidoreductase activity, acting on single donors with incorporation of molecular oxygen, incorporation of two atoms of oxygen;GO:0005515//protein binding;GO:0043169//cation binding;GO:0016701//oxidoreductase activity, acting on single donors with incorporation of molecular oxygen…	GO:0097305//response to alcohol;GO:1901700//response to oxygen-containing compound;GO:0009737//response to abscisic acid;GO:0009753//response to jasmonic acid;GO:0044281//small molecule metabolic process;GO:0009607//response to biotic stimulus;GO:0031407//oxylipin metabolic process;GO:0006631//fatty acid metabolic process;GO:0007275//multicellular organismal development;GO:0009725//response to ho…
NPR1	GRMZM2G077197	0.815	2.56	2.365	1.545	1.56	3.21	3.67	4.56	1.535	1.195	1.9777	0.519636	0.947194	-0.00936818	-0.384535	-	Uncharacterized protein [Source:UniProtKB/TrEMBL;Acc:C0PEI9]	-	-	-	-	-	GO:0005488//binding;GO:0005515//protein binding	-
MYC2	GRMZM2G036554	0.5	0.28	0.72	0.745	1.725	3.045	4.175	4.11	6.735	9.52	2.60644	3.89828	2.51307	3.17637	2.46437	-	Putative HLH DNA-binding domain superfamily protein [Source:UniProtKB/TrEMBL;Acc:K7TMF9]	-	-	-	-	-	GO:0005488//binding;GO:0003676//nucleic acid binding;GO:0005515//protein binding;GO:0097159//organic cyclic compound binding;GO:0046983//protein dimerization activity;GO:0003677//DNA binding;GO:1901363//heterocyclic compound binding	-
MYC2	GRMZM2G333582	2.26	1.13	2.695	0.505	0.52	2.155	11.35	3.45	2.115	2.345	-0.0686349	3.3283	0.356311	2.0663	2.173	-	Putative HLH DNA-binding domain superfamily protein [Source:UniProtKB/TrEMBL;Acc:K7UZ90]	-	-	-	-	GO:0043226//organelle;GO:0043229//intracellular organelle;GO:0043227//membrane-bounded organelle;GO:0044424//intracellular part;GO:0005634//nucleus;GO:0044464//cell part;GO:0043231//intracellular membrane-bounded organelle;GO:0005623//cell;GO:0005622//intracellular	GO:0097159//organic cyclic compound binding;GO:0005515//protein binding;GO:0005488//binding;GO:0003677//DNA binding;GO:0003700//sequence-specific DNA binding transcription factor activity;GO:0001071//nucleic acid binding transcription factor activity;GO:1901363//heterocyclic compound binding;GO:0046983//protein dimerization activity;GO:0003676//nucleic acid binding	GO:2001141//regulation of RNA biosynthetic process;GO:0019219//regulation of nucleobase-containing compound metabolic process;GO:0031323//regulation of cellular metabolic process;GO:0010556//regulation of macromolecule biosynthetic process;GO:0019222//regulation of metabolic process;GO:0031326//regulation of cellular biosynthetic process;GO:0051171//regulation of nitrogen compound metabolic proce…
MYC2	XLOC_021916	0	0	0	0	0.13	3.995	3.02	1.735	0.17	1.775	11.964	11.5603	10.7607	7.40939	3.77124	TCONS_00044107	bHLH transcription factor [Zea mays]	-	-	-	-	-	GO:1901363//heterocyclic compound binding;GO:0005488//binding;GO:0003676//nucleic acid binding;GO:0005515//protein binding;GO:0097159//organic cyclic compound binding	-
